# Supplementary material
Source: ML conference proceedings conference paper supplement (https://openreview.net/forum?id=OiTr2v90t7)
Supplement: supplementary_material [file attachment]

---

# Permutree Process

---

Anonymous Author(s)

Affiliation

Address

email

## Abstract

1 This paper presents a Bayesian nonparametric (BNP) method based on an innova-  
2 tive mathematical concept of the *permutree*, which has recently been introduced in  
3 the field of combinatorics. Conventionally, combinatorial structures such as permu-  
4 tations, trees, partitions and binary sequences have frequently appeared as building  
5 blocks of BNP models, and these models have been independently researched and  
6 developed. However, in practical situations, there are many complicated problems  
7 that require master craftsmanship to combine these individual models into a single  
8 giant model. Therefore, a framework for modelling such complex issues in a unified  
9 manner has continued to be demanded. With this motivation, this paper focuses for  
10 the first time in the context of machine learning on a tool called the permutree. It  
11 encompasses permutations, trees, partitions, and binary sequences as its special  
12 cases, while also allowing for interpolations between them. We exploit the fact that  
13 permutrees have a one-to-one correspondence with special permutations to propose  
14 a stochastic process on permutrees, and further propose a data modeling strategy.  
15 As a significant application, we demonstrate the potential for phylogenetic analysis,  
16 which involve coalescence, recombination, multiple ancestors, and mutation.

## 17 1 Introduction

18 **Various combinatorial structures** - *Permutations, trees, partitions, and binary sequences* have been  
19 frequently utilized in Bayesian modeling, and conventionally, various models have been studied  
20 separately for each subject. *Permutations* have been used in a wide range of applications such  
21 as Bayesian ranking [101, 63, 110, 73], matrix reordering [70, 81, 99], and the traveling salesman  
22 problem [102, 17, 105]. Various random permutation models, such as the Mallows model [54, 12, 16],  
23 the permuton models [37, 7, 51, 6] and the modified Chinese restaurant process [57], have been  
24 employed in Bayesian modeling. *Trees* are typically used for hierarchical clustering [22, 21] and  
25 multiple resolution regression [47, 25, 20]. In the Bayesian literature, the Dirichlet diffusion tree [62,  
26 45], the Mondrian process [88, 87] and the Pólya tree [56, 48, 27, 15] are particularly popular models.  
27 *Partitions and binary sequences* are fundamental tools in machine learning, with numerous examples  
28 of their usage in clustering, factor analysis, feature selection, and more. For the modeling of partitions  
29 and binary sequences, the Dirichlet process mixture model [23, 79, 100, 59], the Pitman-Yor process  
30 mixture model [76], the Chinese restaurant process [74], and the stick-breaking process [89] for  
31 random partitions, and the beta-Bernoulli process and the Indian buffet process [29, 95, 93] for  
32 random binary sequences have frequently been employed.

33 **Combination of different combinatorial structures** - In real-world applications of machine learning,  
34 it is often a useful strategy to combine several different combinatorial structures to model data, rather  
35 than using only one combinatorial structure. For example, the combination of partitioning and factor  
36 models is particularly popular, including the infinite factorial hidden Markov models [24, 97], the  
37 subset infinite relational model [39], the infinite latent factor model with the infinite mixture model  
38 [111, 112] and the kernel beta process [83]. As another example, the combination of tree structures

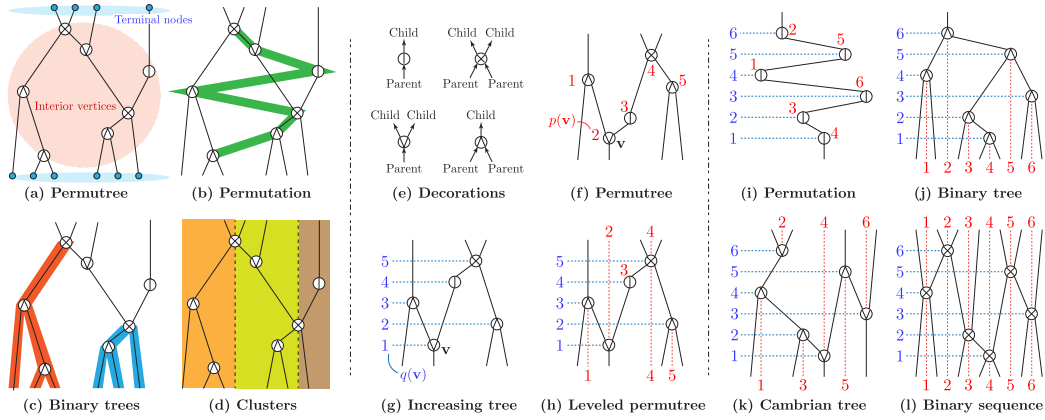

Figure 1: Overview of new combinatorial structures invented in [75]. **Left:** A permutree that is a combinatorial object that includes the concepts of permutations, binary trees, clusters, factors, etc., but can also interpolate between them. The permutree is, as defined, a “directed” tree, but for visibility, the direction of the edges from Parent to Child is omitted in the diagrams. **Middle:** Variant concepts required to represent stochastic processes on permutrees indirectly through *decorated permutations* in Section 3. **Right:** Special cases of permutrees. Remark 2.1 provides details on each interpretation.

39 and partitioning have also been actively studied, including the hierarchical Dirichlet process [94], the  
 40 nested Dirichlet process [84, 64], their hybrid models [2, 71, 50], the infinite context-free grammar  
 41 [49] and the tree-structured stick-breaking process [1, 65]. Furthermore, permutations are occasionally  
 42 employed in conjunction with clustering to analyze relational data [61]. As we have discussed so far,  
 43 this kind of strategy of combining multiple models into a single model is one promising direction for  
 44 research and development. However, advancing research in this direction necessitates the evaluation  
 45 of an enormous number of models in a combinatorial fashion, which becomes infeasible due to the  
 46 exponentially increasing number of potential combinations. Consequently, we are striving to initiate  
 47 a paradigm shift towards exploring an entirely new approach capable of unifying these models.

48 **Key insight** - In our pursuit of creating a unified model capable of encompassing permutations, trees,  
 49 partitions, and binary sequences, we are incorporating the concept of *permutrees* [75], which has  
 50 recently emerged in the field of combinatorics, into the realm of Bayesian nonparametric (BNP)  
 51 machine learning. Permutrees not only serve as a framework that includes permutations, trees,  
 52 partitions, and binary sequences as distinct cases but also exhibit intriguing properties of interpolation  
 53 between them. Figure 1 (a)-(d) provides a concise visual representation of the key characteristics.

54 **Our contributions** - The main contribution of this paper is to produce, by using the concept of  
 55 permutrees, a stochastic process that can represent combinatorial structures such as permutations,  
 56 binary trees, partitions and binary sequences in a unified manner for the first time. Section 3  
 57 exploits the one-to-one correspondence between permutations and certain permutations using a  
 58 two-dimensional marked point process to construct this process, which we call a *permutree process*.  
 59 Section 4 derives a data modelling strategy using this stochastic process by analogy with the stick-  
 60 breaking process that is frequently used in BNP machine learning. Section 5 demonstrates the  
 61 application of phylogenetic analysis of DNA sequence data dealing with multiple biological events  
 62 such as coalescence, recombination, mutation and multiple ancestry in a unified manner.

## 63 2 Preliminaries: Permutree and related objects

64 **Permutree** [75] - A *permutree* is a new mathematical tool invented recently in the field of combi-  
 65 natorics, which not only represent permutations, trees, partitions, and binary sequences as special  
 66 cases, but can also interpolate between them [75]. Let us begin with the definition of a permutree.  
 67 We consider a directed tree  $\mathbf{T}$  with a vertex set  $\mathbf{V}$  of  $n$  ( $n \in \mathbb{N}$ ) vertices of degree at least 2, and a set  
 68 of terminal nodes of degree 1 (See also Figure 1 (a)). For technical reasons (discussed immediately  
 69 below), we dare to pay particular and explicit attention here to the set  $\mathbf{V}$  of the “interior vertices”  
 70 (i.e., vertices of degree at least 2) other than the terminal nodes. Each vertex  $\mathbf{v} \in \mathbf{V}$  is assigned  
 71 a natural number  $p(\mathbf{v})$  as a label, using the **bijective vertex labeling** (one-to-one correspondence)  
 72  $p : \mathbf{V} \rightarrow [n] := \{1, 2, \dots, n\}$  based on the following *permutree requirements* (Definition 1 in [75]):

73 (C1) Each vertex  $\mathbf{v} \in \mathbf{V}$  has one or two parents, and one or two children.

74 (C2) If a vertex  $\mathbf{v}$  has a left parent (or child), then all labels in the subtree of the left ancestor  
75 (or descendant) of  $\mathbf{v}$  are smaller than  $p(\mathbf{v})$ . If  $\mathbf{v}$  has a right parent (or child), then all labels  
76 in the subtree of the right ancestor (or descendant) of  $\mathbf{v}$  are greater than  $p(\mathbf{v})$ .

77 A directed tree  $\mathbf{T}$  that satisfies the above requirements can be expressed more intuitively and clearly  
78 by introducing the notion of *decorations* to the vertices  $\mathbf{V}$ . See also Figure 1 (e). We introduce  
79 the  $n$ -tuple decorations  $\delta(\mathbf{T}) := (\delta(\mathbf{T})_1, \dots, \delta(\mathbf{T})_n) \in \{\oplus, \otimes, \ominus, \oslash\}^n$ , defined as follows: (i)  
80  $\delta(\mathbf{T})_{p(\mathbf{v})} = \oplus$  if  $\mathbf{v}$  has one parent and one child, (ii)  $\delta(\mathbf{T})_{p(\mathbf{v})} = \otimes$  if  $\mathbf{v}$  has two parents and two  
81 children, (iii)  $\delta(\mathbf{T})_{p(\mathbf{v})} = \ominus$  if  $\mathbf{v}$  has one parent (lower in Figure 1 (e)) and two children (upper),  
82 and (iv)  $\delta(\mathbf{T})_{p(\mathbf{v})} = \oslash$  if  $\mathbf{v}$  has two parents (lower) and one child (upper). The symbolic feature of  
83 permutrees can represent various combination objects in a unified manner as follows:

84 **Remark 2.1.** (See Example 4 in [75].) **Permutation** - Permutrees with decoration  $\oplus^n$  have a one-to-  
85 one correspondence with permutations of  $[n]$ . For example, by reading the *horizontal labels* in the  
86 order of the natural number of *vertical labels*, Figure 1 (i) represents a permutation **436152**. **Binary**  
87 **tree** - Permutrees with decoration  $\otimes^n$  have a one-to-one correspondence with rooted planar binary  
88 trees on  $n$  vertices. See Figure 1 (j) for an example. **Cambrian tree** - Permutrees with decoration  
89  $\{\ominus, \oslash\}^n$  are exactly the Cambrian trees proposed in [82, 13]. See Figure 1 (k) for an example.  
90 **Binary sequence** - Permutrees with decoration  $\otimes^{n-1}$  have a one-to-one correspondence with binary  
91 sequences with length  $n - 1$ . The  $i$ th element of the binary sequence is determined according to the  
92 following procedure: for any  $i \in [n - 1]$ , there exists  $p(\mathbf{v}) = i$  and  $p(\mathbf{w}) = i + 1$ , and if  $\mathbf{v}$  is the  
93 parent of  $\mathbf{w}$ , output 1, otherwise output 0. See Figure 1 (l) for **10010** as an example.

94 Now that we have summarized the important property of permutrees, we will describe the findings  
95 necessary to construct a stochastic process on a permutree, which is the main focus of this paper. As  
96 a motivation for describing the following findings, imagine actually drawing an instance of permutree  
97 on a hand-drawn blackboard. At this point, we notice that the *horizontal* positional relationship of  
98 vertices  $\mathbf{V}$  is explicitly given by the natural number label  $p(\cdot \in \mathbf{V})$ , however, the *vertical* positional  
99 relationship is still ambiguous (In Figure 1, (f) is identical to (g) in terms of the permutree, but distinct  
100 in terms of the increasing tree). Hence, in order to construct a stochastic process on permutrees in  
101 a concise and clear manner, a mechanism to control the vertical positioning of the vertices of the  
102 permutrees is required. With this motivation in mind, we introduce two useful notions, an *increasing*  
103 *tree* (Figure 1 (g)) and a *leveled permutree* (Figure 1 (h)).

104 **Leveled permutree** - To define the leveled permutree, we start by introducing an additional notion  
105 of an *increasing tree*. We consider a directed tree  $\mathbf{T}$  with vertex set  $\mathbf{V}$ . Each vertex  $\mathbf{v} \in \mathbf{V}$  is  
106 assigned a natural number label  $q(\mathbf{v})$ , using the bijective vertex labeling (one-to-one correspondence)  
107  $q : \mathbf{V} \rightarrow [n]$  such that, if  $\mathbf{v} \in \mathbf{V}$  is the parent of  $\mathbf{w} \in \mathbf{V}$ , then  $q(\mathbf{v}) < q(\mathbf{w})$  is satisfied. Intuitively,  
108 the function  $q$  serves to label the vertices  $\mathbf{V}$  from 1 to  $n$  vertically from bottom to top (Figure 1 (g)).  
109 Then, a *leveled permutree* is a directed tree  $\mathbf{T}$  with a vertex set  $\mathbf{V}$  endowed with two bijective vertex  
110 labelings  $p, q : \mathbf{V} \rightarrow [n]$  which respectively define a permutree and an increasing tree. By using two  
111 types of labels  $p$  and  $q$ , the horizontal and vertical arrangement of the vertices  $\mathbf{V}$  can be explicitly  
112 specified, as shown in Figure 1 (h). The leveled permutree is a useful tool when considering the  
113 generative model of the permutree in Section 3, because its specification is clear.

114 The notion of a leveled permutree so far has improved the prospects for dealing with permutrees.  
115 However, leveled permutrees are still combinatorial and geometric, and are not yet easy to handle  
116 computationally (in terms of Bayesian modeling, which is the main objective of this paper). Finally,  
117 we would like to wrap up this section by revealing one of the most important aspects of leveled  
118 permutrees: their relationship to *decorated permutations*.

119 **Decorated permutation** - For the description of decorated permutations, the notion of a *permutation*  
120 *table* should be prepared first. A permutation table is a geometrical representation of a permutation  $\sigma$   
121 with  $n$  length by the  $(n \times n)$ -table, with rows labeled by positions from bottom to top and columns  
122 labeled by values from left to right, and with a dot at column  $i$  and row  $\sigma(i)$  for all  $i \in [n]$  [9].  
123 Figure 2 (left) shows an example for a permutation **536214**. Now that we are ready, we move on to  
124 the description of a decorated permutation. A decorated permutation is a permutation table where  
125 each dot is decorated by  $\oplus$ ,  $\otimes$ ,  $\ominus$ , or  $\oslash$ . Figure 2 (left bottom) shows an illustration of a decorated  
126 permutation. One of the important properties of decorated permutations is shown below.

127 **Proposition 2.2.** (See Proposition 8 in [75].) *There exists one-to-one correspondence between*  
128 *decorated permutations with decorations  $\hat{\delta} \in \{\oplus, \otimes, \ominus, \oslash\}^n$  and leveled permutrees with  $\delta(\mathbf{T}) = \hat{\delta}$ .*

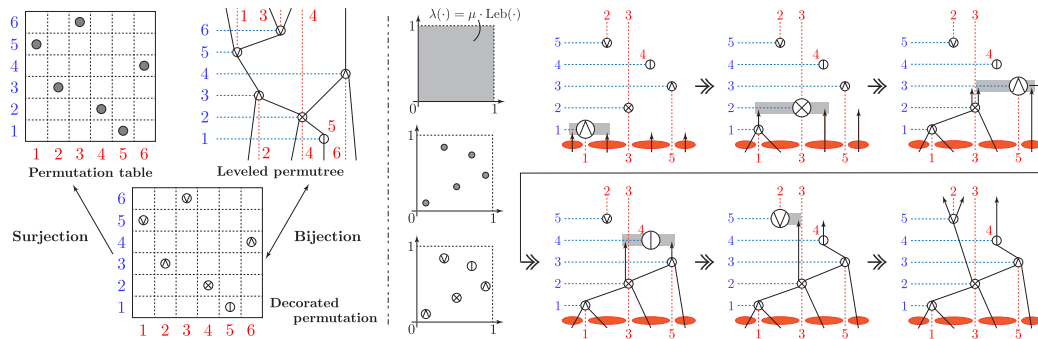

Figure 2: **Left: One-to-one correspondence between decorated permutations and leveled permutrees.** **Right: Permutree process as marked point process** - We introduce an intensity function  $\lambda$  on the plane  $[0, 1] \times [0, 1]$  (top left). Next, we generate random locations  $l_1, \dots, l_n$  from the Poisson point process with intensity  $\lambda$  (middle left). Then, for each random location, we independently assign one of the decorations  $\{\oplus, \otimes, \odot, \ominus\}$  from the categorical distribution as a random mark  $m_i$  ( $i = 1, \dots, n$ ) (bottom left). By reading the positional relationship of the points as a permutation table, the resulting marked point  $\{(l_i, m_i) : i = 1, 2, \dots, n\}$  can be converted to a *decorated permutation*. Furthermore, by the transformation used in Proposition 2.2 [75], the decorated permutation can be converted to a leveled permutree, as follows. First, we draw auxiliary lines (dashed lines colored red) below decorations  $\otimes, \ominus$  and above decorations  $\oplus, \odot$ . From this point on, we will stretch the permutree edges, and it is important to emphasize that the permutree edges do not cross these auxiliary lines. Next, focusing on the auxiliary lines extending to the bottom, we can view these as dividing the lower region into smaller subregions (indicated by the red ovals). The edges are then extended one by one from each subregion. As we extend the edges from the bottom to the top, when they reach the height of each vertex, we connect the adjacent edges to that vertex (indicated by the gray box). By doing this until all vertices are covered, we obtain a *leveled permutree*.

129 Now that we have reviewed the permutree findings, the next and subsequent sections will address  
 130 three challenges: (i) How can we construct a stochastic process that can represent any permutree (in  
 131 Section 3)? (ii) How can we construct a BNP prior model of the data using the stochastic process on  
 132 the permutree (in Section 4)? (iii) What likelihood models can we combine the BNP prior with in  
 133 actual machine learning applications (in Section 5)?

### 134 3 Permutree processes

135 The goal of this section is to construct a stochastic process that can represent any permutree; ideally, as  
 136 is the basic philosophy of BNP, that stochastic process should also be able to simultaneously represent  
 137 randomness with respect to complexity (in the context of permutrees, the number of vertices). In fact,  
 138 our construction below can represent every permutree with an unlimited number of finite or infinite  
 139 number of vertices in a unified manner, depending on certain hyperparameters. One thing to note in  
 140 advance is that the stochastic process described in this section does not refer to any modeling of data.  
 141 We will discuss data modeling in more detail in the next Section 4.

142 **Key insight** - Our strategy is to use point processes. Recall that, as discussed in Section 2, permutrees  
 143 can be represented through leveled permutrees (surjection), and furthermore, leveled permutrees have  
 144 a one-to-one correspondence (bijection) with decorated permutations (Proposition 2.2). Thanks to  
 145 these facts, instead of dealing directly with permutrees (seemingly difficult to handle), we can obtain  
 146 a model of permutrees indirectly by considering a model of decorated permutations. So how can we  
 147 model decorated permutations? We represent the random decorated permutations as a *marked point*  
 148 *process* by considering random permutations as a *point process* and random decorations as *marks*.

149 **Marked point process for decorated permutations** - We consider a marked point process consisting  
 150 of a point process and associated marks, which can be expressed as  $\{(l_i, m_i) : i = 1, 2, \dots\}$ , where  
 151  $l_1, l_2, \dots$  are locations and  $m_1, m_2, \dots$  are associated marks. Specifically, we employ the following  
 152 Poisson process on a 2-dimensional plane  $[0, 1] \times [0, 1]$  with discrete marks (Figure 2 right):

- 153 • **Random locations** - We draw the random locations  $l_1, l_2, \dots$  from a Poisson point process on  
 154 the plane  $[0, 1] \times [0, 1]$  with the intensity function  $\lambda : [0, 1] \times [0, 1] \rightarrow \mathbb{R}^+$ , where  $\mathbb{R}^+ = \{r :$   
 155  $r > 0, r \in \mathbb{R}\}$ . Although not essential, for the sake of simplicity, we use a *homogeneous* Poisson

156 point process, that is,  $\lambda(A) = \mu \cdot \text{Leb}(A)$  for all measurable subset  $A$  of  $[0, 1] \times [0, 1]$ , where  
 157  $\text{Leb}(\cdot)$  indicates the Lebesgue measure, and  $0 < \mu < \infty$  is a tunable variable. For convenience,  
 158 let  $\mathbf{l}_i = (l_{i,1}, l_{i,2})$ , where  $l_{i,1}$  and  $l_{i,2}$  are the horizontal and vertical positions, respectively.

159 • **Random marks** - We draw the random marks  $m_1, m_2, \dots, m_n$  independently from a categorical  
 160 distribution on  $\{\oplus, \otimes, \ominus, \odot\}$ : Categorical( $c_{\oplus}, c_{\otimes}, c_{\ominus}, c_{\odot}$ ), where  $c_* \geq 0$  ( $*$   $\in \{\oplus, \otimes, \ominus, \odot\}$ )  
 161 denotes the probability that decoration  $*$  is adopted.

162 **Transformation to leveled permutree** - The above marked point process can immediately lead to a  
 163 random leveled permutree with the following procedure. Recall that, as described in Section 2, the  
 164 leveled permutree is defined by (i) the decorations on the vertices  $\mathbf{V}$  and (ii) the two bijective vertex  
 165 labelings  $p, q : \mathbf{V} \rightarrow [n]$ . For the decoration of vertices, we consider the point set of the marked  
 166 point process as the vertex set  $\mathbf{V}$ , and the mark  $m_i$  assigned to the  $i$ -th point as the decoration of  
 167 the  $i$ -th vertex  $\mathbf{v}_i \in \mathbf{V}$ . Thus, the remainder to be considered is the setting of two functions  $p$  and  
 168  $q$ . By construction, we can obtain the indices  $a_1, \dots, a_n$  so that the random positions  $\mathbf{l}_1, \dots, \mathbf{l}_n$   
 169 are in ascending order in the horizontal direction, that is,  $l_{a_1,1} < l_{a_2,1} < \dots < l_{a_n,1}$  (Recall that  
 170  $\mathbf{l}_i = (l_{i,1}, l_{i,2})$ , and  $l_{i,1}$  represents the horizontal position). Similarly, in the vertical direction, we can  
 171 obtain the indices  $b_1, \dots, b_n$  so that  $l_{b_1,2} < l_{b_2,2} < \dots < l_{b_n,2}$ . Now, if we choose to set  $p(\mathbf{v}_{a_i}) = i$   
 172 and  $q(\mathbf{v}_{b_i}) = i$  for  $i = 1, 2, \dots, n$ , then  $p$  and  $q$  satisfy the requirement of bijective functions. By the  
 173 above, we have seen that indeed the marked point process provides us with what we need to define a  
 174 leveled permutree, that is, the vertex decorations and two bijective functions  $p$  and  $q$ . Finally, Figure  
 175 2 (right) show the procedure for explicitly converting a marked point process to a random leveled  
 176 permutree. Inheriting Proposition 2.2 and the result (with the proof procedure) of [75, Proposition 8],  
 177 we can confirm that this transformation is well defined (See Appendix E for details).

## 178 4 Data modeling with permutree process

179 The purpose of this section is to show how the permutree process described earlier can be used for  
 180 modeling actual data. More specifically, this consists of the following two issues:

181 • **How to represent data using permutrees:** As permutrees themselves are simply mathematical  
 182 objects, we must be clear about how we relate them to data modeling and analysis. In fact,  
 183 there are many possible ways to describe data by permutrees. We consider the situation where  
 184 a *data path* (a lineage to describe the data in conjunction with some likelihood model, such as  
 185 the evolutionary model in Section 5) from one of the lower terminal nodes to one of the upper  
 186 terminal nodes on the permutree is assigned to each data (Figure 3 (a), top). For example, if we  
 187 restrict the permutree to one of its special cases, the binary tree, this data path is attributed to  
 188 the path from the root to the terminal node, which is a situation commonly used in hierarchical  
 189 clustering (Figure 3 (a), bottom).<sup>1</sup> We show a strategy to represent this random data path using a  
 190 special variant of the nested Chinese restaurant process [10].

191 • **How to “implement” a permutree process:** In the previous section, we have shown that a marked  
 192 point process with an intensity function  $\lambda : [0, 1] \times [0, 1] \rightarrow \mathbb{R}^+$  can be used for the stochastic  
 193 process on permutrees. On the other hand, another important topic is to clarify how to implement  
 194 models (or more practically, what intensity function  $\lambda$  to use) suitable for data analysis. Our  
 195 strategy is to use the analogy of the stick-breaking process [89] to represent the infinite number  
 196 of marked points generated from the marked point process, which is the entity of the permutree  
 197 process. This can be viewed as a special case of using beta intensity in the horizontal direction and  
 198 uniform intensity in the vertical direction as the intensity function  $\lambda$  of the permutree process.

199 Experts in the BNP field might remind themselves that there are many other strategy options for the  
 200 above topics in the light of the various findings that have emerged in the history of the development  
 201 of the BNP method over the last 20 years. We will, for the sake of space, summarize in Appendix D  
 202 the various ideas and their respective advantages and disadvantages with respect to those historical  
 203 findings, including whether it is possible to extend the conventional tool of the “ordered” Chinese  
 204 restaurant process [77, 85] for random binary trees to random permutrees. The main body of this  
 205 paper focuses on the most straightforward strategy.

<sup>1</sup>Some readers may wish to consider another typical situation: a path where the data starts at one of the terminal nodes and “stops at an interior vertex” of the permutree. This modification can be easily achieved by additionally introducing a chain of Bernoulli trials [10] or a time limit by representing the growth of the path as a Markov process on a virtual time axis [88, 87]. Therefore, we will focus on the most basic situation.

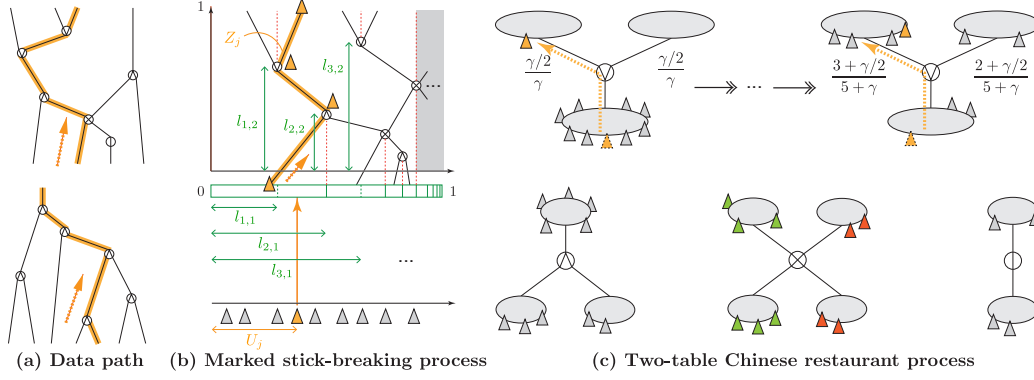

Figure 3: **(a) Data path** - We consider each data as having a **data path** (a lineage to describe the data in conjunction with some likelihood model) from one of the lower terminal nodes to one of the upper terminal nodes on the permutree (top). This will convince us of its generality and applicability, as it is attributed to the hierarchical clustering from one of the terminal nodes to the root when restricting the permutree to the special case of a binary tree (bottom). **(b) Marked stick breaking process** - Inspired by the stick-breaking representation [89] for the construction of Dirichlet processes [23], in order to represent a random permutree of infinite size, we can represent the random vertex positions of the permutree by the stick-breaking process in the horizontal direction and uniform random measures in the vertical direction. **(c) Two-table Chinese restaurant process** (Variant of two-class Dirichlet allocation) - The data allocated to the lower terminal nodes are successively merged and distributed depending on the mark of each vertex, according to the law of the 'the rich get richer', to select paths.

206 **Permutree of infinite size** - We first generate random positions  $l_1, l_2, \dots, l_k = (l_{k,1}, l_{k,2}), \dots$  in  
 207 the point process of the permutree process, as shown in Figure 3 (b), using the stick-breaking process:

$$\beta_k \sim \text{Beta}(1, \alpha), \quad l_{k,1} = \sum_{i=1}^k \left\{ \beta_i \prod_{i'=1}^{i-1} (1 - \beta_{i'}) \right\}, \quad l_{k,2} \sim \text{Uniform}([0, 1]), \quad (1)$$

208 where  $\alpha > 0$  is the concentration parameter. As in the original permutree process, each point mark  
 209  $m_k$  ( $k = 1, 2, \dots$ ) is generated from a categorical distribution:  $m_k \sim \text{Categorical}(c_{\oplus}, c_{\otimes}, c_{\circledast}, c_{\circledcirc})$ .  
 210 As mentioned earlier, by the procedure in Figure 2 (right), we can transform this sample (i.e., a set of  
 211 infinite number of marked points) drawn from the permutree process into a uniquely single permutree.

212 **Data assignments to bottom terminal nodes** - Next, we can represent data modeling by the *paint-*  
 213 *box* scheme for the random permutree generated from the marked stick-breaking process described  
 214 earlier. We associate one uniform random variable  $U_j$  for each data indexed by  $j = 1, 2, \dots, N$   
 215 ( $N \in \mathbb{N}$ ):  $U_j \sim \text{Uniform}([0, 1])$ . Similar to Kingman's representation to the exchangeable partitions,  
 216 called *paintbox* schemes [44, 11], we choose which terminal node on the lower edge of the permutree  
 217 to assign the  $j$ th data to, depending on which stick in the stick-breaking process this random variable  
 218  $U_j$  is located on  $[0, 1]$ , as shown in Figure 3 (b).

219 **Data path modeling** - Finally, we model the path assignment for each data by choosing a path that  
 220 starts at this assigned lower terminal node and reaches one of the upper terminal nodes through the  
 221 following *two-table Chinese restaurant process* (i.e., variant of two-class Dirichlet allocation):

- 222 •  $\circledast$  - We break up the set of data flowing in, following the left-right table-assignment operation  
 223 below<sup>2</sup>: the first data is chosen uniformly at random from either the left or the right table. For the  
 224  $n$ th data, the left table is chosen with probability  $(\mathcal{N}_{\text{Left}} + \gamma/2)/(n + \gamma)$  and the right table with  
 225 probability  $(\mathcal{N}_{\text{Right}} + \gamma/2)/(n + \gamma)$ , where  $\gamma > 0$  is a hyperparameter, and  $\mathcal{N}_{\text{Left}}$  and  $\mathcal{N}_{\text{Right}}$   
 226 are the number of data allocated so far to the left and right tables respectively.
- 227 •  $\circledcirc$  - We merge the sets of data flowing from the two lower branches and feed them into the upper.
- 228 •  $\otimes$  - It would be straightforward to perform operations whose marks are  $\circledast$  and  $\circledcirc$  together.  
 229 Another promising option is the representation of data flowing from the left parent to the left  
 230 child and from the right parent to the right child. This can be interpreted as giving the mark  $\otimes$   
 231 the ability to *partitioning*. This interpretation also plays an important role in the validity of *finite*  
 232 *truncation*, which will be discussed below.

<sup>2</sup>This is equivalent to a categorical-Dirichlet hierarchical model with two classes (two tables). We can obtain the form described in the text by marginalising the intermediate Dirichlet variable in this hierarchical model.

233 •  $\oplus$  - We pass on the whole data set that flows in, all the way to the top.

234 For notational simplicity, we will denote the random variable for the  $j$ th data path by  $Z_j$ . For a  
235 sample  $z$  of data paths between the upper and lower terminal nodes of the permutree (specified by a  
236 sequence of edges), the above generative probabilistic model allows us to evaluate the probability  
237  $\mathbb{P}[Z_j = z]$  of the  $j$ th data choosing a data path sample  $z$ .

238 **Property #1: Exchangeability** - Random data paths based on the generative probability model  
239 described above have *exchangeability*, an important property common to most BNP models [3, 36, 41].  
240 Simply put, the model probability is invariant to the indexing of the data. As a result, it follows the  
241 philosophy of BNP models that even if the actual data to be observed is finite, the model itself, with  
242 infinite complexity, can reflect the uncertainty due to unobserved data. More specifically, this can be  
243 summarised as the following statement:

244 **Proposition 4.1** (Exchangeability). *For any permutation  $\sigma$  of length  $N$  ( $N \in \mathbb{N}$ ), we have  $\mathbb{P}[Z_1 =$   
245  $z_1, Z_2 = z_2, \dots, Z_N = z_N] = \mathbb{P}[Z_{\sigma(1)} = z_1, Z_{\sigma(2)} = z_2, \dots, Z_{\sigma(N)} = z_N]$ , where  $z_j$  ( $j \in [N]$ ) is  
246 a sample of paths of random permutrees. (See Appendix A.1 for proof.)*

247 **Property #2: Validity of finite truncation** - The above generative probability model requires in  
248 principle an infinite number of random variables for its description, but finite truncation works  
249 reasonably well for a finite number of actual observed data. This poses an inherently non-trivial  
250 challenge that is not present in the validity of approximating the stick-breaking process [89] for the  
251 Dirichlet process [23] with a finite number of stick-breaking procedures, which is a typical topic  
252 in the past [94, 87, 67]. The reason for this non-triviality is that the substructure of a permutree  
253 with infinite size is, in principle, affected by an infinite number of all marked vertices. Therefore,  
254 restricting the structure of the permutree to only some marked vertices may have a significant impact  
255 on the structure of the permutree. However, as the following statement shows, the substructure of the  
256 permutree has the good property that it depends only on a subset of marked vertices.

257 **Proposition 4.2** (Finite truncation). *In the above generative probability model of data indexed by  
258  $j = 1, 2, \dots, N$  ( $N \in \mathbb{N}$ ), we consider an event that all random variables  $U_j$  ( $j = 1, \dots, N$ ),  
259 representing the horizontal position of the  $j$ th data, falls in the range  $[0, 1 - \epsilon]$  as a situation with a  
260 sufficiently high probability  $\mathbb{P}[\bigwedge_{j=1}^N 0 \leq U_j < 1 - \epsilon] = \prod_{j=1}^N \mathbb{P}[0 \leq U_j < 1 - \epsilon] > 1 - \epsilon \cdot \mathcal{O}(N)$ ,  
261 where  $\epsilon > 0$  is a tiny real value. In this situation, there exists some natural number  $K < \infty$ , and  
262 all data paths are assigned with probability 1 only to paths on the finite-size random permutree  
263 generated from the random marked points  $\mathbf{l}_1, \mathbf{l}_2, \dots, \mathbf{l}_K$ . (See Appendix A.2 for proof.)*

## 264 5 Application to phylogenetic permutree analysis

265 This section presents an application example of using the prior model representation of data using  
266 permutrees, which has been described in Section 4, in conjunction with a likelihood model in a  
267 specific application. One of the most promising applications of permutrees would be phylogenetic  
268 tree analysis for DNA molecular sequence data (e.g., CAGTC). DNA sequences from one or more  
269 populations are related by a branching structure known as genealogy. The complex correlative  
270 structure of a collection of DNA sequences can be represented as a phylogenetic tree, a record of  
271 *coalescence*, *recombination*, and *mutation* events in the history of the target organism: *coalescence*  
272 refers to the event in which two sequences are attributed to a common ancestor, *recombination* refers  
273 to the event in which a lineage splits into two sub-lineages when looking back in time from the  
274 present to the past, and *mutation* refers to the change of each letter of a DNA sequence over time.

275 **Challenges of conventional methods** - The most standard structure that has been used in phylogenetic  
276 analysis is the binary tree [66, 78, 58, 103, 98, 113, 107, 106, 60]. In fact, binary trees are very  
277 well suited to represent *coalescence* events in genealogy. However, one drawback of binary tree  
278 models is that they are not suitable for representing *recombination* events in a way that is compatible  
279 with coalescence events. To circumvent this drawback, the ancestral recombination graphs (ARGs)  
280 have sometimes been used as models that can represent both coalescence and recombination at the  
281 same time [52, 42, 80, 72, 90, 28]. However, it is not easy to model or infer ARGs directly, and  
282 often indirect ways of representing models by other perspectives (e.g., the fragmentation-coagulation  
283 process [92, 19]) have been explored, or approximate models (e.g., the coalescent hidden Markov  
284 model [34, 53] and the sequentially Markov coalescent model [80]) have been considered. Moreover,  
285 conventional phylogenetic tree analysis, including not only ARGs but also binary tree models,

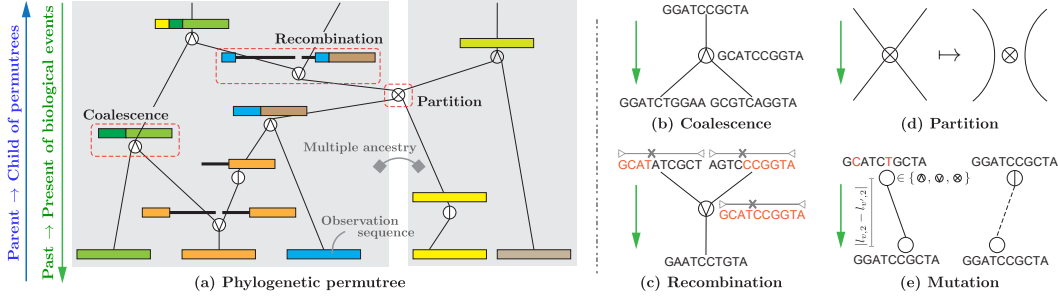

Figure 4: (a) **Phylogenetic permutree** can simultaneously and unifiedly represent (b) **coalescence**, (c) **recombination**, multiple ancestry through (d) **partition**, and (e) **mutation**. We note that the **past (upper) to present (lower)** direction (indicated by  $\downarrow$ ) as biological events is the opposite of the **parent (lower) to child (upper)** direction (indicated by  $\uparrow$ ) of the permutree as a purely mathematical object.

286 generally imposes a strong assumption that observed DNA sequences or observed taxa have a single ancestor. In other words, this implies that the inferred phylogenetic tree should be a strongly  
 287 connected graph. Needless to say, such an assumption is reasonable for taxa that have been carefully  
 288 selected by biologists. On the other hand, when we want to use a large number of taxa that are too  
 289 large to be selected by experts as observation data (i.e., the situation that BNP methods are really  
 290 aiming for), a mechanism that allows multiple ancestors to be inferred in a data-driven manner will  
 291 be very useful. In light of the above, phylogenetic tree analysis requires a model that can represent  
 292 coalescence, recombination, multiple ancestors, and mutation in a unified manner.  
 293

294 **Phylogenetic permutree** - As input observation data, we used DNA (molecular) sequences observed  
 295 at letter length  $S$  over  $N$  species. For example, the sequence **GAGTAC** (i.e.,  $N = 1$  species) has  
 296 length  $S = 6$ . We regard these DNA sequences as following a *phylogenetic permutree*. Specifically,  
 297 we represent coalescence, recombination, multiple ancestry, and mutation events in genealogy by  
 298 combining the four types of the decorations  $\circledast$ ,  $\circledcirc$ ,  $\otimes$ ,  $\oplus$  with the following interpretations. We note  
 299 that, to be consistent with the traditional notation of phylogenetic tree analysis, the **past (upper) to**  
 300 **present (lower)** direction as biological events is the opposite of the **parent (lower) to child (upper)**  
 301 direction of the permutree as a purely mathematical object that we have used in the diagrams so far.

- 302 • **Coalescence**  $\circledast$  - A coalescence event represents two lineages (bottom side of Figure 4 (b))  
 303 having a common ancestral lineage (top side).
- 304 • **Recombination**  $\circledcirc$  - A recombination event represents the joining of two exclusive sub-  
 305 sequences of two lineages (top side of Figure 4 (c)) by one lineage (bottom).
- 306 • **Partition**  $\otimes$  - We give the decoration  $\otimes$  the role of division so that a single permutree can  
 307 represent a phylogenetic tree with multiple ancestors. Specifically, as shown in Figure 4 (d),  
 308 we connect the two left edges and connect the two right edges resulting in two tree structures  
 309 unconnected to each other on either side of decoration  $\otimes$ .
- 310 • **Backward in time**  $\oplus$  (optional) - We assume that no mutation occurs while going back in time  
 311 from a vertex to a vertex with  $\oplus$  (Figure 4 (e)). This allows us to set the mutation rate in the  
 312 evolutionary model as a single parameter common to all branches, and the mutation rate can be  
 313 adjusted according to the permutree itself.

314 **Evolutionary models on permutrees** - Statistical models of gene mutation have a history of more  
 315 than half a century, and a vast number of models have been proposed. An excellent recent review  
 316 article can be found, for example, in [4]. For simplicity, we adopt two of the most popular models,  
 317 the Jukes-Cantor model (JC) [40] and the generalized time reversible model (GTR) [91], for DNA  
 318 sequences (i.e., words with A, G, C, and T as letters of the alphabet  $\{A, G, C, T\}$ , such as **CCTAAG**).  
 319 JC is defined as a Markov process in which (1) all letters are independently generated from a uniform  
 320 categorical distribution on  $\{A, G, C, T\}$  as initialization and (2) one letter (e.g., **A**) changes to another  
 321 letter (e.g., **G**) after  $t$  seconds with probability  $(1 - \exp(-4\alpha t))/4$  or does not mutate with probability  
 322  $(1 + 3 \exp(-4\alpha t))/4$ , where  $\alpha (> 0)$  is a hyperparameter representing the mutation rate. Simply put,  
 323 JC means that the transition probabilities of letters in mutation are fixed. GTR, on the other hand, can  
 324 be regarded as a more flexible version of the JC model, in which the letter transition probabilities  
 325 themselves are also estimated from the data as hidden parameters.



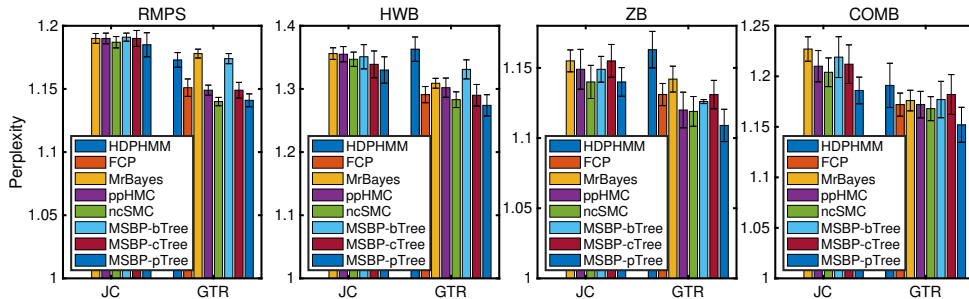

Figure 5: Experimental results of test perplexity (mean±std) comparison for real-world data.

326 **Demonstration** - We use the following three benchmark datasets [60] for DNA sequences: RMPS  
 327 ( $N = 64$  species,  $S = 1008$  length) [86], HWB ( $N = 41$ ,  $S = 1137$ ) [33], and ZB ( $N = 50$ ,  
 328  $S = 1133$ ) [108]. In addition, to establish a situation where the permutree notion would be useful  
 329 (i.e., multiple ancestry derived from exclusive disconnected graphs), we extract the sequences of  
 330 these datasets by  $S = 1000$  length from the beginning and mix them to create a dataset we call  
 331 COMB ( $N = 155$ ). We use the marked stick-breaking process (referred to as MSBP; Section 4)  
 332 as our proposed model. Since MSBP can easily adjust the representational capabilities of of its  
 333 own model, as ablation studies, we use MSBP-bTree as the one restricted to binary trees (with the  
 334 prior  $(c_{\emptyset}, c_{\infty}, c_{\circlearrowleft}, c_{\circlearrowright}) \sim \text{Dirichlet}(\epsilon/2, 0, 0, \epsilon/2)$ ), MSBP-cTree as the one restricted to Cambrian  
 335 trees (with  $\text{Dirichlet}(\epsilon/3, 0, \epsilon/3, \epsilon/3)$ ), and MSBP-pTree as the main proposal permutrees (with  
 336  $\text{Dirichlet}(\epsilon/4, \epsilon/4, \epsilon/4, \epsilon/4)$ ), where we set  $\epsilon = 0.01$ . For the evolutionary model, we employ  
 337 the mutation rate  $\alpha \sim \text{Gamma}(\epsilon', \epsilon')$ , where  $\epsilon' = 0.1$ . We only present the case of  $K = 100$   
 338 as the truncation level here, while we report the other cases in Appendix C. We compare these  
 339 models to the hierarchical Dirichlet process hidden Markov model (HDPHMM) [8, 94, 5], the  
 340 fragmentation-coagulation process (FCP) [92], and the binary tree model with the MrBayes [38, 46],  
 341 the probabilistic path Hamilton Monte Carlo (ppHMC) [18], and the nested combinatorial sequential  
 342 Monte Carlo (ncSMC) [60]. It is noted that HDPHMM and FCP do not use evolutionary models  
 343 because they represent sequence data directly without tree structure. We held out 20% letters of the  
 344 input sequences for testing, and each model was trained using the remaining 80% of the letters. Each  
 345 inference method uses MCMC to estimate the posterior distribution by the following 100 samples:  
 346 each method extracts 5 MCMC runs with different random numbers, and each MCMC run is sampled  
 347 every 50 iterations after 2000 burn-in until 3000 iterations. We evaluate the models using perplexity  
 348 as a criterion:  $\text{perplexity}(\cdot) = \exp(-(\log p(\cdot))/E)$ , where  $E$  is the number of missing letters in the  
 349 input sequences. Figure 5 shows the comparison of the prediction performance of each method for  
 350 the four sets of data. As an overall trend, it can be seen that the Cambrian tree and permutree models  
 351 show better prediction performance than the binary tree model, which has limited expressive power.

## 352 6 Discussion and limitation

353 This paper (i) imports the notion of permutrees, recently invented in combinatorics, to Bayesian  
 354 analysis, (ii) proposes the stochastic process that can represent various models such as permutations,  
 355 trees, partitions, and factors in a unified manner, (iii) and applies it to phylogenetic permutree analysis.

356 **Limitations** - While our proposed permutree process can represent various combinatorial structures  
 357 in a unified “prior model,” the likelihood model that describes the data (as we have shown in the  
 358 context of phylogenetic tree analysis in Section 5, for example) must be prepared separately by the  
 359 user or engineer. Thus, while the permutree process is a tool that allows data-driven inference of the  
 360 model structure as a broad framework, the design of the likelihood model needs to be carefully done  
 361 manually. In the near future, the exploration of representing this likelihood model in some kind of  
 362 black box function model would be an important research direction.

363 **Remaining challenge** - In the technical context of the BNP field, an important topic is whether a  
 364 marginalized representation of the marked stick-breaking process, an infinite-dimensional intermedi-  
 365 ate random variable in the representation of data paths with exchangeability described in Section 4,  
 366 can be obtained. This topic is a question closely related to the Aldous-Hoover-Kallenberg representa-  
 367 tion theorem for exchangeability in general [3, 36, 41]. As a more familiar analogy, it corresponds  
 368 to the fact that if we marginalise the stick-breaking process representation in a Dirichlet process  
 369 infinite mixture model, then we obtain the Chinese restaurant process representation. Our strategy  
 370 and budding attempts on this question are summarized in Appendix D.

## References

- 371
- 372 [1] Ryan Prescott Adams, Zoubin Ghahramani, and Michael I. Jordan. Tree-structured stick breaking for  
373 hierarchical data. In *Advances in Neural Information Processing Systems*, pages 19–27, 2010.
- 374 [2] Priyanka Agrawal, Lavanya Sita Tekumalla, and Indrajit Bhattacharya. Nested hierarchical Dirichlet  
375 process for nonparametric entity-topic analysis. In *Machine Learning and Knowledge Discovery in  
376 Databases*, volume 8189, pages 564–579, 2013.
- 377 [3] David J. Aldous. Representations for partially exchangeable arrays of random variables. *Journal of  
378 Multivariate Analysis*, 11:581–598, 1981.
- 379 [4] Miguel Arenas. Trends in substitution models of molecular evolution. *Frontiers in Genetics*, 6, 2015.
- 380 [5] Marius Bartcus, Faicel Chamroukhi, and Hervé Glotin. Hierarchical Dirichlet process hidden Markov  
381 model for unsupervised bioacoustic analysis. In *2015 International Joint Conference on Neural Networks*,  
382 pages 1–7. IEEE, 2015.
- 383 [6] Frédérique Bassino, Mathilde Bouvel, Valentin Féray, Lucas Gerin, Mickaël Maazoun, and Adeline  
384 Pierrot. Universal limits of substitution-closed permutation classes. *Journal of the European Mathematical  
385 Society*, 22(11):3565–3639, 2019.
- 386 [7] Frédérique Bassino, Mathilde Bouvel, Valentin Féray, Lucas Gerin, and Adeline Pierrot. The Brownian  
387 limit of separable permutations. *The Annals of Probability*, 46(4):2134—2189, 2018.
- 388 [8] Matthew J. Beal, Zoubin Ghahramani, and Carl Edward Rasmussen. The infinite hidden Markov model.  
389 In *Advances in Neural Information Processing Systems 14*, pages 577–584. MIT Press, 2001.
- 390 [9] Anders Björner and Michelle L. Wachs. Permutation statistics and linear extensions of posets. *Journal of  
391 Combinatorial Theory, Series A*, 58(1):85–114, 1991.
- 392 [10] D. M. Blei, M. I. Jordan, T. L. Griffiths, and J. B. Tenenbaum. Hierarchical topic models and the nested  
393 Chinese restaurant process. pages 17–24, 2003.
- 394 [11] Tamara Broderick, Jim Pitman, and Michael I. Jordan. Feature allocations, probability functions, and  
395 paintboxes. *Bayesian Analysis*, 8(4):801 – 836, 2013.
- 396 [12] Róbert Busa-Fekete, Dimitris Fotakis, Balázs Szörényi, and Emmanouil Zampetakis. Identity testing for  
397 Mallows model. In *Advances in Neural Information Processing Systems*, pages 23179–23190, 2021.
- 398 [13] Grégory Chatel and Vincent Pilaud. Cambrian Hopf algebras. *arXiv:1411.3704*, 2014.
- 399 [14] Anand Vir Singh Chauhan, Shivshankar Reddy, Maneet Singh, Karamjit Singh, and Tanmoy Bhowmik.  
400 Deviation-based marked temporal point process for marker prediction. In *Machine Learning and  
401 Knowledge Discovery in Databases. Research Track*, volume 12975, pages 289–304, 2021.
- 402 [15] William Cipolli and Timothy Hanson. Supervised learning via smoothed Pólya trees. *Advances in Data  
403 Analysis and Classification*, 13(4):877–904, 2019.
- 404 [16] Fabien Collas and Ekhine Irurozki. Concentric mixtures of Mallows models for top-k rankings: sampling  
405 and identifiability. In *International Conference on Machine Learning*, volume 139, pages 2079–2088,  
406 2021.
- 407 [17] Tiago Tiburcio da Silva, Antônio Augusto Chaves, Horacio Hideki Yanasse, and Henrique Pacca Loureiro  
408 Luna. The multicommodity traveling salesman problem with priority prizes: a mathematical model and  
409 metaheuristics. *Computational and Applied Mathematics*, 38(4), 2019.
- 410 [18] Vu Dinh, Arman Bilge, Cheng Zhang, and Frederick A. Matsen IV. Probabilistic path hamiltonian monte  
411 carlo. In *International Conference on Machine Learning*, volume 70, pages 1009–1018, 2017.
- 412 [19] Lloyd T. Elliott and Yee Whye Teh. Scalable imputation of genetic data with a discrete fragmentation-  
413 coagulation process. In *Advances in Neural Information Processing Systems*, pages 2861–2869, 2012.
- 414 [20] Xuhui Fan, Bin Li, Ling Luo, and Scott A. Sisson. Bayesian nonparametric space partitions: A survey. In  
415 *International Joint Conference on Artificial Intelligence*, pages 4408–4415, 2021.
- 416 [21] Xuhui Fan, Bin Li, and Scott A. Sisson. The binary space partitioning-tree process. In *International  
417 Conference on Artificial Intelligence and Statistics*, pages 1859–1867, 2018.

- 418 [22] Xuhui Fan, Bin Li, Yi Wang, Yang Wang, and Fang Chen. The Ostomachion Process. In *AAAI Conference*  
419 *on Artificial Intelligence*, pages 1547–1553, 2016.
- 420 [23] Thomas Ferguson. Bayesian analysis of some nonparametric problems. *Annals of Statistics*, 2(1):209–230,  
421 1973.
- 422 [24] Jurgen Van Gael, Yee Whye Teh, and Zoubin Ghahramani. The infinite factorial hidden Markov model.  
423 In *Advances in Neural Information Processing Systems*, pages 1697–1704, 2008.
- 424 [25] Shufei Ge, Shijia Wang, Yee Whye Teh, Liangliang Wang, and Lloyd Elliott. Random tessellation forests.  
425 In *Advances in Neural Information Processing Systems*, pages 9575–9585. 2019.
- 426 [26] Weina Ge and Robert T. Collins. Marked point processes for crowd counting. In *IEEE Computer Society*  
427 *Conference on Computer Vision and Pattern Recognition*, pages 2913–2920, 2009.
- 428 [27] Bernhard Gittenberger and Veronika Kraus. The degree profile of random Pólya trees. *Journal of*  
429 *Combinatorial Theory, Series A*, 119(7):1528–1557, 2012.
- 430 [28] Robert C. Griffiths and Paul Marjoram. Ancestral inference from samples of DNA sequences with  
431 recombination. *Journal of Computational Biology*, 3(4):479–502, 1996.
- 432 [29] Thomas L. Griffiths and Zoubin Ghahramani. Infinite latent feature models and the Indian buffet process.  
433 In *Advances in Neural Information Processing Systems*, 2005.
- 434 [30] Ruocheng Guo, Jundong Li, and Huan Liu. INITIATOR: noise-contrastive estimation for marked temporal  
435 point process. In *International Joint Conference on Artificial Intelligence*, pages 2191–2197. ijcai.org,  
436 2018.
- 437 [31] Tobias Hatt and Stefan Feuerriegel. Early detection of user exits from clickstream data: A Markov  
438 modulated marked point process model. In *WWW: The Web Conference*, pages 1671–1681, 2020.
- 439 [32] Xiaoyu He and Matthew Kwan. Universality of random permutations. *arXiv:1911.12878*, 2019.
- 440 [33] Daniel A. Henk, Alex Weir, and Meredith Blackwell. Laboulbeniopsis termitarius, an ectoparasite of  
441 termites newly recognized as a member of the laboulbeniomyces. *Mycologia*, 95(4):561–564, 2003.
- 442 [34] Asger Hobolth, Ole F Christensen, Thomas Mailund, and Mikkel H Schierup. Genomic relationships and  
443 speciation times of human, chimpanzee, and gorilla inferred from a coalescent hidden Markov model.  
444 *PLOS Genetics*, 3(2):1–11, 02 2007.
- 445 [35] Sujun Hong and Hirotaka Hachiya. Multi-stream based marked point process. In *Asian Conference on*  
446 *Machine Learning*, volume 157, pages 1269–1284, 2021.
- 447 [36] Douglas N. Hoover. Relations on probability spaces and arrays of random variables. Technical report,  
448 Institute of Advanced Study, Princeton, 1979.
- 449 [37] Carlos Hoppen, Yoshiharu Kohayakawa, Carlos Gustavo Moreira, Balazs Rath, and Rudini Menezes  
450 Sampaio. Limits of permutation sequences. *Journal of Combinatorial Theory, Series B*, 103(1):93–113,  
451 2013.
- 452 [38] John P. Huelsenbeck and Fredrik Ronquist. MrBayes: bayesian inference of phylogenetic trees. *Bioinform.*,  
453 17(8):754–755, 2001.
- 454 [39] Katsuhiko Ishiguro, Naonori Ueda, and Hiroshi Sawada. Subset infinite relational models. In *International*  
455 *Conference on Artificial Intelligence and Statistics*, volume 22, pages 547–555, 2012.
- 456 [40] Thomas H. Jukes and Charles R. Cantor. Chapter 24 - evolution of protein molecules. In *Mammalian*  
457 *Protein Metabolism*, pages 21–132. Academic Press, 1969.
- 458 [41] Olav Kallenberg. Symmetries on random arrays and set-indexed processes. *Journal of Theoretical*  
459 *Probability*, 5(4):727–765, 1992.
- 460 [42] Steven Kelk. Review of recombinatorics: The algorithmics of ancestral recombination graphs and explicit  
461 phylogenetic networks by dan gusfield. *SIGACT News*, 47(1):12–15, 2016.
- 462 [43] Hideaki Kim, Tomoharu Iwata, Yasuhiro Fujiwara, and Naonori Ueda. Read the silence: Well-timed  
463 recommendation via admixture marked point processes. In *AAAI Conference on Artificial Intelligence*,  
464 pages 132–139, 2017.

- 465 [44] John Frank Charles Kingman. The representation of partition structures. *Journal of the London Mathe-*  
466 *matical Society*, s2-18(2):374–380, 1978.
- 467 [45] David A. Knowles, Jurgen Van Gael, and Zoubin Ghahramani. Message passing algorithms for the  
468 Dirichlet diffusion tree. In *International Conference on Machine Learning*, pages 721–728, 2011.
- 469 [46] Lidia Kuan, Frederico Pratas, Leonel Sousa, and Pedro Tomás. MrBayes sMC<sup>3</sup>. *International Journal of*  
470 *High Performance Computing Applications*, 32(2):246–265, 2018.
- 471 [47] Balaji Lakshminarayanan, Daniel Roy, and Yee Whye Teh. Mondrian forests: Efficient online random  
472 forests. In *Advances in Neural Information Processing Systems*, 06 2014.
- 473 [48] Michael Lavine. Some Aspects of Pólya Tree Distributions for Statistical Modelling. *The Annals of*  
474 *Statistics*, 20(3):1222 – 1235, 1992.
- 475 [49] Percy Liang, Slav Petrov, Michael I. Jordan, and Dan Klein. The infinite PCFG using hierarchical  
476 Dirichlet processes. In *Joint Conference on Empirical Methods in Natural Language Processing and*  
477 *Computational Natural Language Learning*, pages 688–697, 2007.
- 478 [50] Tengfei Ma, Issei Sato, and Hiroshi Nakagawa. The hybrid nested/hierarchical Dirichlet process and its  
479 application to topic modeling with word differentiation. In *AAAI Conference on Artificial Intelligence*,  
480 pages 2835–2841, 2015.
- 481 [51] Mickaël Maazoun. On the Brownian separable permuton. *Combinatorics, Probability and Computing*,  
482 29(2):241–266, 2019.
- 483 [52] Ali Mahmoudi, Jere Koskela, Jerome Kelleher, Yao-ban Chan, and David J. Balding. Bayesian inference  
484 of ancestral recombination graphs. *PLoS Computational Biology*, 18(3), 2022.
- 485 [53] Thomas Mailund, Julien Y. Dutheil, Asger Hobolth, Gerton Lunter, and Mikkel H. Schierup. Estimating  
486 divergence time and ancestral effective population size of bornean and sumatran orangutan subspecies  
487 using a coalescent hidden Markov model. *PLoS Genetics*, 7(3):1–15, 03 2011.
- 488 [54] Colin L. Mallows. Non-null ranking models. *Biometrika*, 44:114–130, 1957.
- 489 [55] Luca Mancini and Anna Maria Paganoni. Marked point process models for the admissions of heart failure  
490 patients. *Statistical Analysis and Data Mining*, 12(2):125–135, 2019.
- 491 [56] Daniel Mauldin, William D. Sudderth, and Stanley C. Williams. Pólya trees and random distributions.  
492 *The Annals of Statistics*, 20(3):1203 – 1221, 1992.
- 493 [57] Peter McCullagh. Random permutations and partition models, 2010.
- 494 [58] Gráinne McGuire, Michael C. Denham, and David J. Balding. MAC5: Bayesian inference of phylogenetic  
495 trees from DNA sequences incorporating gaps. *Bioinform.*, 17(5):479–480, 2001.
- 496 [59] Jeffrey W. Miller and Matthew T. Harrison. Mixture models with a prior on the number of components.  
497 *Journal of the American Statistical Association*, 113(521):340–356, 2018.
- 498 [60] Antonio Khalil Moretti, Liyi Zhang, Christian A. Naesseth, Hadiyah Venner, David M. Blei, and Itsik  
499 Pe’er. Variational combinatorial sequential Monte Carlo methods for Bayesian phylogenetic inference. In  
500 *Thirty-Seventh Conference on Uncertainty in Artificial Intelligence*, volume 161, pages 971–981, 2021.
- 501 [61] Masahiro Nakano, Akisato Kimura, Takeshi Yamada, and Naonori Ueda. Baxter permutation process. In  
502 *Advances in Neural Information Processing Systems*, 2020.
- 503 [62] Radford M. Neal. Density modeling and clustering using Dirichlet diffusion trees. *Bayesian Statistics*,  
504 7:619–629, 2003.
- 505 [63] Quoc Phong Nguyen, Sebastian Tay, Bryan Kian Hsiang Low, and Patrick Jaillet. Top-k ranking bayesian  
506 optimization. In *AAAI Conference on Artificial Intelligence*, pages 9135–9143, 2021.
- 507 [64] Kai Ni, Lawrence Carin, and David B. Dunson. Multi-task learning for sequential data via ihmms and the  
508 nested dirichlet process. In *International Conference on Machine Learning*, volume 227, pages 689–696,  
509 2007.
- 510 [65] Lukasz P. Olech, Michal Spytkowski, Halina Kwasnicka, and Zbigniew Michalewicz. Hierarchical  
511 data generator based on tree-structured stick breaking process for benchmarking clustering methods.  
512 *Information Sciences*, 554:99–119, 2021.

- 513 [66] Gary J. Olsen, Hideo Matsuda, Ray Hagstrom, and Ross A. Overbeek. fastdnaml: a tool for construction  
514 of phylogenetic trees of DNA sequences using maximum likelihood. *Computer Applications in the*  
515 *Biosciences*, 10(1):41–48, 1994.
- 516 [67] Peter Orbanz. Projective limit random probabilities on polish spaces. *Electronic Journal of Statistics*, 5,  
517 2011.
- 518 [68] Mathias Ortner, Xavier Descombes, and Josiane Zerubia. Building outline extraction from digital elevation  
519 models using marked point processes. *International Journal of Computer Vision*, 72(2):107–132, 2007.
- 520 [69] Mathias Ortner, Xavier Descombes, and Josiane Zerubia. A marked point process of rectangles and  
521 segments for automatic analysis of digital elevation models. *IEEE Transactions on Pattern Analysis and*  
522 *Machine Intelligence*, 30(1):105–119, 2008.
- 523 [70] Daniel Osei-Kuffuor, Ruipeng Li, and Yousef Saad. Matrix reordering using multilevel graph coarsening  
524 for ILU preconditioning. *SIAM Journal on Scientific Computing*, 37(1), 2015.
- 525 [71] John W. Paisley, Chong Wang, David M. Blei, and Michael I. Jordan. Nested hierarchical Dirichlet  
526 processes. *IEEE Transactions on Pattern Analysis and Machine Intelligence*, 37(2):256–270, 2015.
- 527 [72] Laxmi Parida. Ancestral recombinations graph: A reconstructability perspective using random-graphs  
528 framework. *Journal of Computational Biology*, 17(10):1345–1370, 2010.
- 529 [73] Agyemang Paul, Zhefu Wu, Kai Liu, and Shufeng Gong. Robust multi-objective visual Bayesian  
530 personalized ranking for multimedia recommendation. *Applied Intelligence*, 52(4):3499–3510, 2022.
- 531 [74] Rainer Picard and Jim Pitman. *Combinatorial Stochastic Processes: Ecole d’Eté de Probabilités de*  
532 *Saint-Flour XXXII - 2002*. Lecture Notes in Mathematics. Springer Berlin Heidelberg, 2006.
- 533 [75] Vincent Pilaud and Viviane Pons. Permutrees. *Electronic Notes in Discrete Mathematics*, 61:987–993,  
534 2017.
- 535 [76] J. Pitman and M. Yor. The two-parameter poisson-dirichlet distribution derived from a stable subordinator.  
536 *IBM Journal of Research and Development*, 2(25):855–900, 1997.
- 537 [77] Jim Pitman and Matthias Winkel. Regenerative tree growth: Binary self-similar continuum random trees  
538 and poisson-dirichlet compositions. *The Annals of Probability*, 37(5):1999–2041, 2009.
- 539 [78] Andrew Rambaut and Nicholas C. Grassly. Seq-gen: an application for the monte carlo simulation of DNA  
540 sequence evolution along phylogenetic trees. *Computer Applications in the Biosciences*, 13(3):235–238,  
541 1997.
- 542 [79] Carl Edward Rasmussen. The infinite Gaussian mixture model. In *Advances in Neural Information*  
543 *Processing Systems*, 2000.
- 544 [80] Matthew D. Rasmussen, Melissa J. Hubisz, Ilan Gronau, and Adam Siepel. Genome-wide inference of  
545 ancestral recombination graphs. *PLoS Genetics*, 10(5):1–27, 05 2014.
- 546 [81] Parisa Rastin and Basarab Matei. Incremental matrix reordering for similarity-based dynamic data sets.  
547 In *Neural Information Processing*, volume 10638, pages 76–84, 2017.
- 548 [82] Nathan Reading. Cambrian lattices. *Advances in Mathematics*, 205(2):313–353, 2006.
- 549 [83] Lu Ren, Yingjian Wang, David B. Dunson, and Lawrence Carin. The kernel beta process. In *Advances in*  
550 *Neural Information Processing Systems*, pages 963–971, 2011.
- 551 [84] Abel Rodriguez and Kaushik Ghosh. Nested partition models. Technical report, JackBaskin School of  
552 Engineering, 2009.
- 553 [85] Dane Rogers and Matthias Winkel. A Ray–Knight representation of up-down Chinese restaurants.  
554 *Bernoulli*, 28(1):689—712, 2021.
- 555 [86] Amy Y. Rossman, John M. McKemy, Rebecca A. Pardo-Schultheiss, and Hans-Josef Schroers. Molecular  
556 studies of the bionectriaceae using large subunit rDNA sequences. *Mycologia*, 93(1):100–110, 2001.
- 557 [87] Daniel Roy. *Computability, inference and modeling in probabilistic programming*. PhD thesis, Mas-  
558 sachusetts Institute of Technology, 2011.
- 559 [88] Daniel Roy and Yee Whye Teh. The Mondrian process. In *Advances in Neural Information Processing*  
560 *Systems*, 2009.

- 561 [89] Jayaram Sethuraman. A constructive definition of Dirichlet priors. *Statistica Sinica*, 4:639–650, 1994.
- 562 [90] Kyung-Ah Sohn and Eric P. Xing. Hidden markov dirichlet process: Modeling genetic recombination in  
563 open ancestral space. In *Advances in Neural Information Processing Systems*, pages 1305–1312. MIT  
564 Press, 2006.
- 565 [91] Simon Tavaré. Some probabilistic and statistical problems in the analysis of dna sequences. 1986.
- 566 [92] Yee Whye Teh, Charles Blundell, and Lloyd T. Elliott. Modelling genetic variations using fragmentation-  
567 coagulation processes. In *Advances in Neural Information Processing Systems*, pages 819–827, 2011.
- 568 [93] Yee Whye Teh, Dilan Grür, and Zoubin Ghahramani. Stick-breaking construction for the Indian buffet  
569 process. In *International Conference on Artificial Intelligence and Statistics*, volume 2, pages 556–563.  
570 PMLR, 21–24 Mar 2007.
- 571 [94] Yee Whye Teh, Michael I. Jordan, Matthew Beal, and David Blei. Hierarchical Dirichlet processes.  
572 *Journal of the American Statistical Association*, 101:1566–1581, 2006.
- 573 [95] Romain Thibaux and Michael I. Jordan. Hierarchical beta processes and the Indian buffet process. In  
574 *International Conference on Artificial Intelligence and Statistics*, volume 2, pages 564–571, 2007.
- 575 [96] Ákos Utasi and Csaba Benedek. A 3-D marked point process model for multi-view people detection. In  
576 *IEEE Conference on Computer Vision and Pattern Recognition*, pages 3385–3392, 2011.
- 577 [97] Isabel Valera, Francisco J. R. Ruiz, and Fernando Pérez-Cruz. Infinite factorial unbounded-state hidden  
578 Markov model. *IEEE Transactions on Pattern Analysis and Machine Intelligence*, 38(9):1816–1828,  
579 2016.
- 580 [98] Ivan Vogel, Frantisek Zedek, and Pavel Ocenasek. Constructing phylogenetic trees based on intra-group  
581 analysis of human mitochondrial DNA. In *Human Interface and the Management of Information*, volume  
582 6771 of *Lecture Notes in Computer Science*, pages 165–169. Springer, 2011.
- 583 [99] Gauthier Van Vracem and Siegfried Nijssen. Iterated matrix reordering. In *Machine Learning and  
584 Knowledge Discovery in Databases*, volume 12977, pages 745–761, 2021.
- 585 [100] S. Walker. Sampling the Dirichlet mixture model with slices. *Communications in Statistics Simulation  
586 and Computation*, 36(1):45–54, 2007.
- 587 [101] Chao Wang, Hengshu Zhu, Chen Zhu, Chuan Qin, and Hui Xiong. Setrank: A setwise bayesian approach  
588 for collaborative ranking from implicit feedback. In *AAAI Conference on Artificial Intelligence*, pages  
589 6127–6136, 2020.
- 590 [102] Yong Wang and Jeffrey B. Remmel. A binomial distribution model for the traveling salesman problem  
591 based on frequency quadrilaterals. *Journal of Graph Algorithms and Applications*, 20(2):411–434, 2016.
- 592 [103] Dan Wei and Qingshan Jiang. A DNA sequence distance measure approach for phylogenetic tree  
593 construction. In *Fifth International Conference on Bio-Inspired Computing: Theories and Applications*,  
594 pages 204–212. IEEE, 2010.
- 595 [104] Weichang Wu, Junchi Yan, Xiaokang Yang, and Hongyuan Zha. Decoupled learning for factorial marked  
596 temporal point processes. In *International Conference on Knowledge Discovery & Data Mining*, pages  
597 2516–2525, 2018.
- 598 [105] Liang Xin, Wen Song, Zhiguang Cao, and Jie Zhang. NeuroLKH: Combining deep learning model with  
599 lin-kernighan-helsgaun heuristic for solving the traveling salesman problem. In *Advances in Neural  
600 Information Processing Systems*, pages 7472–7483, 2021.
- 601 [106] Cheng Zhang. Improved variational Bayesian phylogenetic inference with normalizing flows. In *Advances  
602 in Neural Information Processing Systems*, 2020.
- 603 [107] Cheng Zhang and Frederick A. Matsen IV. Variational Bayesian phylogenetic inference. In *International  
604 Conference on Learning Representations*.
- 605 [108] Ning Zhang and Meredith Blackwell. Molecular phylogeny of dogwood anthracnose fungus (*discula  
606 destructiva*) and the diaporthales. *Mycologia*, 93(2):355–365, 2001.
- 607 [109] Ping Zhang, Rishabh K. Iyer, Ashish Tendulkar, Gaurav Aggarwal, and Abir De. Learning to select  
608 exogenous events for marked temporal point process. In *Advances in Neural Information Processing  
609 Systems*, pages 347–361, 2021.

- 610 [110] Qian Zhang and Fuji Ren. Prior-based bayesian pairwise ranking for one-class collaborative filtering.  
611 *Neurocomputing*, 440:365–374, 2021.
- 612 [111] Mingyuan Zhou, Haojun Chen, John W. Paisley, Lu Ren, Guillermo Sapiro, and Lawrence Carin.  
613 Non-parametric bayesian dictionary learning for sparse image representations. In *Advances in Neural*  
614 *Information Processing Systems*, pages 2295–2303, 2009.
- 615 [112] Mingyuan Zhou, Hongxia Yang, Guillermo Sapiro, David B. Dunson, and Lawrence Carin. Dependent  
616 hierarchical beta process for image interpolation and denoising. In *International Conference on Artificial*  
617 *Intelligence and Statistics*, volume 15, pages 883–891, 2011.
- 618 [113] Quan Zou, Shixiang Wan, and Xiangxiang Zeng. Hptree: Reconstructing phylogenetic trees for ultra-large  
619 unaligned DNA sequences via NJ model and hadoop. In *IEEE International Conference on Bioinformatics*  
620 *and Biomedicine*, pages 53–58. IEEE Computer Society, 2016.

## 621 A Properties of marked stick-breaking process

622 This section provides proofs of Propositions 4.1 and 4.2 concerning two properties of the marked  
623 stick-breaking process omitted in Section 4 of the main text.

### 624 A.1 Exchangeability

625 One of the most important properties of random data paths drawn from the generative probabilistic  
626 model described in Section 4 is *exchangeability*, that is, the model probability is invariant to the  
627 indexing of the data. More specifically, this can be summarised as the following statement:

628 **Proposition A.1** (Exchangeability; Proposition 4.1). *For any permutation  $\sigma$  of length  $N$  ( $N \in \mathbb{N}$ ),*  
629 *we have  $\mathbb{P}[Z_1 = z_1, Z_2 = z_2, \dots, Z_N = z_N] = \mathbb{P}[Z_{\sigma(1)} = z_1, Z_{\sigma(2)} = z_2, \dots, Z_{\sigma(N)} = z_N]$ ,*  
630 *where  $z_j$  ( $j \in [N]$ ) is a sample of paths of random permutrees.*

631 *Proof.* Broadly as a whole, we will check two following facts:

- 632 (i) The random data assignments to bottom terminal nodes by the stick-breaking process [89]  
633 and the Kingman’s paintbox scheme [44] are themselves exchangeable.
- 634 (ii) The selection of data paths by the two-table Chinese restaurant process is exchangeable.

635 **Exchangeability of data assignments to bottom terminal nodes** - We denote the index of the stick  
636 of the stick-breaking process to which the  $j$ th ( $j = 1, \dots, N$ ) data is assigned by the random variable  
637  $Z_j^{\text{bottom}}$ . It follows from the model construction that, given a random partition of  $[0, 1]$  drawn from  
638 the stick-breaking process, the random variable  $U_j$  ( $j = 1, \dots, N$ ) is independent. As a result, for  
639 any permutation  $\sigma$  of length  $N$ , we have

$$\begin{aligned} \mathbb{P}\left[Z_1^{(\text{bottom})} = s_N, \dots, Z_N^{(\text{bottom})} = s_N\right] &= \prod_{j=1}^N \left[Z_j^{(\text{bottom})} = s_j\right] = \prod_{j=1}^N \left[Z_{\sigma(j)}^{(\text{bottom})} = s_j\right] \\ &= \mathbb{P}\left[Z_{\sigma(1)}^{(\text{bottom})} = s_N, \dots, Z_{\sigma(N)}^{(\text{bottom})} = s_N\right], \quad (2) \end{aligned}$$

640 where  $s_j$  ( $j = 1, \dots, N$ ) is a sample of stick indices ( $\in \mathbb{N}$ ).

641 **Exchangeability of data path selection** - Given the assignment of data to the terminal nodes, the  
642 choice of data paths follows a chain of the two-table Chinese restaurant process (see Figure 3 (c) in  
643 the main text) according to the decoration of each inner vertex of the permutree. It should be noted  
644 that in the two-table Chinese restaurant process, the data paths are chosen deterministically when  
645 the decorations are  $\oplus, \otimes$ , and  $\ominus$ . Therefore, we only need to focus on the case of table partitioning  
646 (Figure 3 (c), top) when the decoration is  $\odot$ . It immediately from the model construction that the  
647 probability of partitioning the data when the decoration is  $\odot$  is obtained as follows:

$$\begin{aligned} &\mathbb{P}\left[Z_1 = z_1, \dots, Z_N = z_N \mid Z_1^{(\text{bottom})} = s_N, \dots, Z_N^{(\text{bottom})} = s_N\right] \\ &= \prod_r \frac{\left\{ \left(1 + \frac{\gamma}{2}\right) \cdots \left(\mathcal{N}_{\text{Left}}^{(r)} + \frac{\gamma}{2}\right) \right\} \cdot \left\{ \left(1 + \frac{\gamma}{2}\right) \cdots \left(\mathcal{N}_{\text{Right}}^{(r)} + \frac{\gamma}{2}\right) \right\}}{(1 + \gamma)(2 + \gamma) \cdots (n^{(r)} + \gamma)}, \quad (3) \end{aligned}$$

648 where the variable  $s_j$  is the index of bottom terminal nodes (i.e., the stick index of the stick-breaking  
649 process on  $[0, 1]$ ) included in the path sample  $z_j$ , the variable  $n^{(r)}$  represents the number of data  
650 flowing to the  $r$ th permutree vertex from the bottom in the vertical direction in the collection of data  
651 path samples  $z_1, \dots, z_N$ , and  $\mathcal{N}_{\text{Left}}^{(r)}$  and  $\mathcal{N}_{\text{Right}}^{(r)}$  represent the number of data to be partitioned into  
652 the left and right tables at the  $r$ th vertex (if the decoration at that vertex is  $\otimes$ ), respectively. It is  
653 important to note that the probability of selecting this datapath depends only on the number of data in  
654 the division of the table at each vertex. That is, in other words, it does not depend on the index of the  
655 data as follows:

$$\begin{aligned} & \mathbb{P}\left[Z_1 = z_1, \dots, Z_N = z_N \mid Z_1^{(\text{bottom})} = s_N, \dots, Z_N^{(\text{bottom})} = s_N\right] \\ &= \mathbb{P}\left[Z_{\sigma(1)} = z_1, \dots, Z_{\sigma(N)} = z_N \mid Z_{\sigma(1)}^{(\text{bottom})} = s_N, \dots, Z_{\sigma(N)}^{(\text{bottom})} = s_N\right], \end{aligned} \quad (4)$$

656 for any permutation  $\sigma$  with length  $N$ . Thus, it can be checked that the selection of data paths is  
657 exchangeable. From Equations 2 and 4, we have completed our proof.  $\square$

## 658 A.2 Validity of finite truncation

659 The generative probability model (described in Section 4) requires in principle an infinite number of  
660 random variables for its description, but finite truncation works reasonably well for a finite number of  
661 actual observed data. More specifically, we can summarize this property as follows:

662 **Proposition A.2** (Finite truncation; Proposition 4.2). *In the generative probability model (described*  
663 *in Section 4) of data indexed by  $j = 1, 2, \dots, N$  ( $N \in \mathbb{N}$ ), we consider an event that all random*  
664 *variables  $U_j$  ( $j = 1, \dots, N$ ), representing the horizontal position of the  $j$ th data, falls in the range*  
665  *$[0, 1 - \epsilon]$  as a situation with a sufficiently high probability  $\mathbb{P}[\bigwedge_{j=1}^N 0 \leq U_j < 1 - \epsilon] = \prod_{j=1}^N \mathbb{P}[0 \leq$   
666  *$U_j < 1 - \epsilon] > 1 - \epsilon \cdot \mathcal{O}(N)$ , where  $\epsilon > 0$  is a tiny real value. In this situation, there exists some*  
667 *natural number  $K < \infty$ , and all data paths are assigned with probability 1 only to paths on the*  
668 *finite-size random permutree generated from the random marked points  $l_1, l_2, \dots, l_K$ .**

669 *Proof.* It follows from the construction that the uniformly random random variables  $U_j$   
670 ( $j = 1, \dots, N$ ) are independent, so that the probability of an event for which all those random  
671 variables fall within the range  $[0, 1 - \epsilon]$  can be checked as follows.

$$\mathbb{P}\left[\bigwedge_{j=1}^N 0 \leq U_j < 1 - \epsilon\right] = \prod_{j=1}^N \mathbb{P}\left[0 \leq U_j < 1 - \epsilon\right] = (1 - \epsilon)^N > 1 - \epsilon N. \quad (5)$$

672 Then, from the construction of the marked stick-breaking process on  $[0, 1]$ , since there are countably  
673 infinite number of marked points in the range  $[1 - \epsilon, 1] \times [0, 1]$ , the probability that there exists some  
674 natural number  $K < \infty$  and the corresponding decoration of it is  $\otimes$  is 1. That is, we have

$$\mathbb{P}\left[K < \infty \wedge m_K = \otimes \wedge 1 - \epsilon \leq l_{K,1} \leq 1\right] = 1. \quad (6)$$

675 From the construction of the two-table Chinese restaurant process (described in Section 4) and  
676 the permutree requirement (C2) (described in Section 2), the data path assigned to the 1st to  $K$ th  
677 bottom terminal nodes in the stick-breaking process never reaches the  $(K + 1)$ th and subsequent  
678 indexed permutree vertices. Therefore, each have a data path only on the edges of the finite permutree  
679 consisting of the 1st to  $K$ th marked vertices. From the above, we have completed the proof.  $\square$

## 680 B Relationship between permutree process and other stochastic processes

681 The purpose of this section is to provide additional information to help the reader better understand  
682 the characteristics of the permutree process as marked point process.

683 We clarify the relationship between the permutree process and other existing stochastic processes.  
684 Specifically, the permutree process can lead to the *uniform random permutations* and the *Mondrian*  
685 *process* as its special cases. These relationships can be derived immediately from the fact that each  
686 can be expressed as a Poisson process of some sort. We will discuss each of these in specific detail



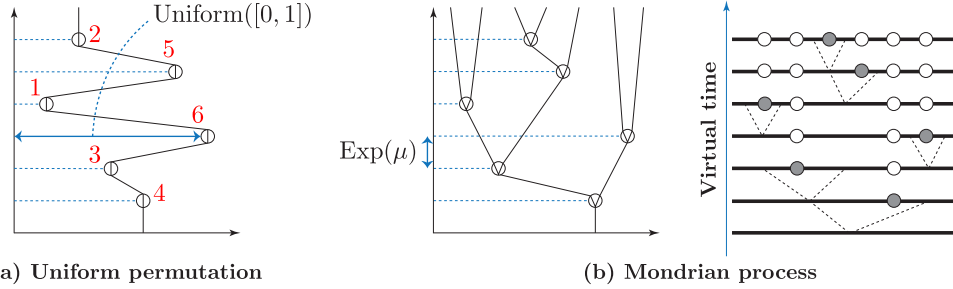

Figure 6: Relationship between permutree process and other existing stochastic processes. **(a) Uniform random permutation** - If we restrict the decoration weights for marks to  $(c_{\oplus}, c_{\otimes}, c_{\ominus}, c_{\circ}) = (1, 0, 0, 0)$  and make the Poisson process homogeneous, the permutree process leads to a stochastic process that generates a *uniform random permutation*. This relation follows immediately from the following fact: If a collection of i.i.d. uniform random variables  $U_1, U_2, \dots \sim \text{Uniform}([0, 1])$  is ordered in ascending order, it follows a uniform random permutation. **(b) Mondrian process** - If we restrict the decoration weights to  $(c_{\oplus}, c_{\otimes}, c_{\ominus}, c_{\circ}) = (0, 0, 1, 0)$  and set  $\lambda(\cdot) = \mu \cdot \text{Leb}(\cdot)$ , the permutree process leads to a stochastic process that simulates a *Mondrian process* [88, 87] on  $[0, 1]$  with the intensity  $\mu$  and the budget 1. By viewing the vertical position in the marked point process as the moment when the event of the cut in the Markov process (i.e., the Mondrian process) occurs, and the horizontal position as the location where the cut occurs, the special permutation process described above can be reduced to a Mondrian process.

687 below. First of all, for self-containment, the core of the permutree process is restated, although it is  
 688 the same as that detailed in the body of this paper.

689 **Permutree process** - We consider a marked point process consisting of a point process and associate  
 690 marks, which can be expressed as  $\{(l_i, m_i) : i = 1, 2, \dots\}$ , where  $l_1, l_2, \dots$  are locations and  
 691  $m_1, m_2, \dots$  are associated marks. Specifically, we employ the following Poisson process on a  
 692 2-dimensional plane  $[0, 1] \times [0, 1]$  with discrete marks:

- 693 • **Random locations** - Draw the random locations  $l_1, l_2, \dots$  from a Poisson point process  
 694 on the plane  $[0, 1] \times [0, 1]$  with the intensity function  $\lambda : [0, 1] \times [0, 1] \rightarrow \mathbb{R}^+$ , where  
 695  $\mathbb{R}^+ = \{r : r > 0, r \in \mathbb{R}\}$ . For notational convenience, we use  $l_i = (l_{i,1}, l_{i,2}) \in \mathbb{R}^2$ , where  
 696  $l_{i,1}$  and  $l_{i,2}$  are the horizontal and vertical positions, respectively.
- 697 • **Random marks** - Draw the random marks  $m_1, m_2, \dots, m_n$  independently from a categorical  
 698 distribution on  $\{\oplus, \otimes, \ominus, \circ\}$ :  $\text{Categorical}(c_{\oplus}, c_{\otimes}, c_{\ominus}, c_{\circ})$ , where  $c_*$  ( $* \in \{\oplus, \otimes, \ominus, \circ\}$ )  
 699 denotes the probability that decoration  $*$  is adopted.

700 **Connection to uniform random permutation** - If we restrict the decoration weights for marks to  
 701  $(c_{\oplus}, c_{\otimes}, c_{\ominus}, c_{\circ}) = (1, 0, 0, 0)$  and make the Poisson process homogeneous (i.e., make the intensity  
 702 function  $\lambda$  uniform), the permutree process leads to a stochastic process that generates a *uniform*  
 703 *random permutation*. This fact can be easily derived by interpreting the permutation process as  
 704 follows. See also Figure 6 (a). By construction, we can obtain the indices  $a_1, \dots, a_n$  so that the  
 705 random positions  $l_1, \dots, l_n$  are in ascending order in the horizontal direction, that is,  $l_{a_1,1} < l_{a_2,1} <$   
 706  $\dots < l_{a_n,1}$ . If we choose to set  $p(v_{a_i}) = i$  for the  $i$ -th vertex  $v_i$  ( $i = 1, 2, \dots$ ) of the resulting  
 707 permutree, then  $p$  can lead to a permutation. The following fact shows that  $p$  corresponds to a uniform  
 708 random permutation:

709 **Proposition B.1.** (See, for example, Lemma 2.2 in [32].) *A uniform random permutation  $\sigma$  with*  
 710 *length  $n$  can be obtained via a sequence of  $n$  i.i.d.  $\text{Uniform}([0, 1])$  random variables  $W_1, \dots, W_n$*   
 711 *(Note that their values are distinct with probability 1), by taking  $\sigma$  to be the unique permutation for*  
 712 *which  $W_{\sigma(1)} < \dots < W_{\sigma(n)}$ .*

713 **Connection to Mondrian process** - If we restrict the decoration weights to  $(c_{\oplus}, c_{\otimes}, c_{\ominus}, c_{\circ}) =$   
 714  $(0, 0, 1, 0)$  and set  $\lambda(\cdot) = \mu \cdot \text{Leb}(\cdot)$ , the permutree process leads to a stochastic process that simulates  
 715 a *Mondrian process* [88, 87] on  $[0, 1]$  with the intensity  $\mu$  and the budget 1. This fact can be easily  
 716 derived by interpreting the permutation process as follows. In the above setup, the sample generated  
 717 by the permutation process can be restricted to a binary tree by following the procedure described in

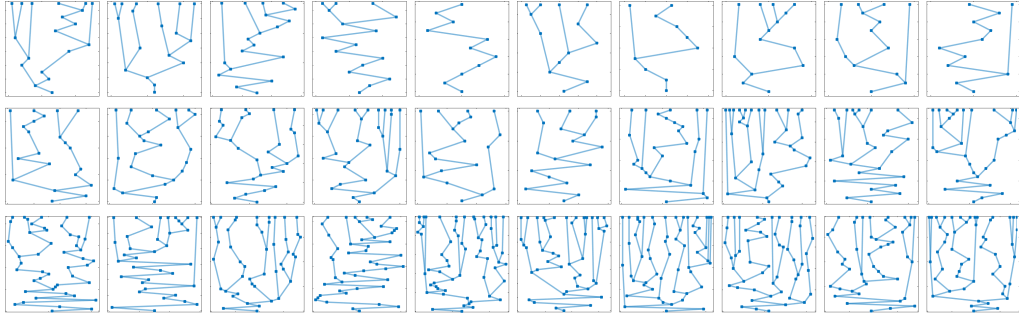

(a)  $(c_{\circlearrowleft}, c_{\circlearrowright}, c_{\circlearrowup}, c_{\circlearrowdown}) = (3/4, 0, 0, 1/4)$  with  $\mu = 10$  (top),  $\mu = 20$  (middle), and  $\mu = 40$  (bottom).

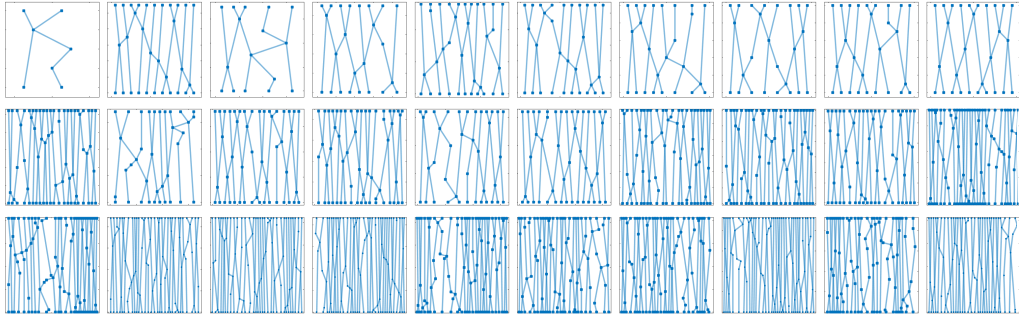

(b)  $(c_{\circlearrowleft}, c_{\circlearrowright}, c_{\circlearrowup}, c_{\circlearrowdown}) = (1/4, 3/4, 0, 0)$  with  $\mu = 10$  (top),  $\mu = 20$  (middle), and  $\mu = 40$  (bottom).

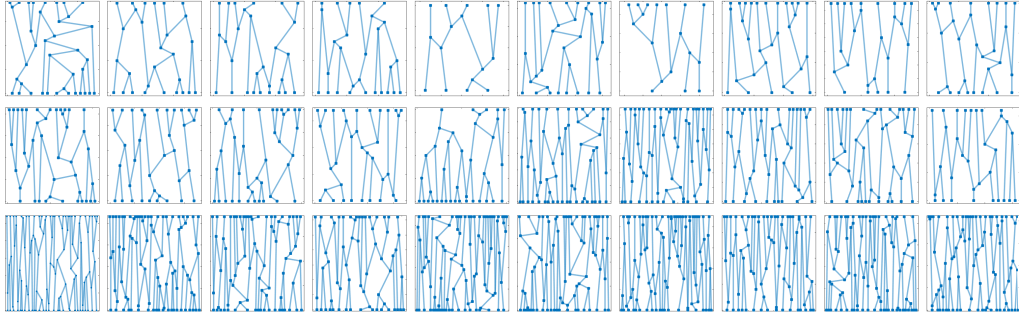

(c)  $(c_{\circlearrowleft}, c_{\circlearrowright}, c_{\circlearrowup}, c_{\circlearrowdown}) = (0, 0, 1/2, 1/2)$  with  $\mu = 10$  (top),  $\mu = 20$  (middle), and  $\mu = 40$  (bottom).

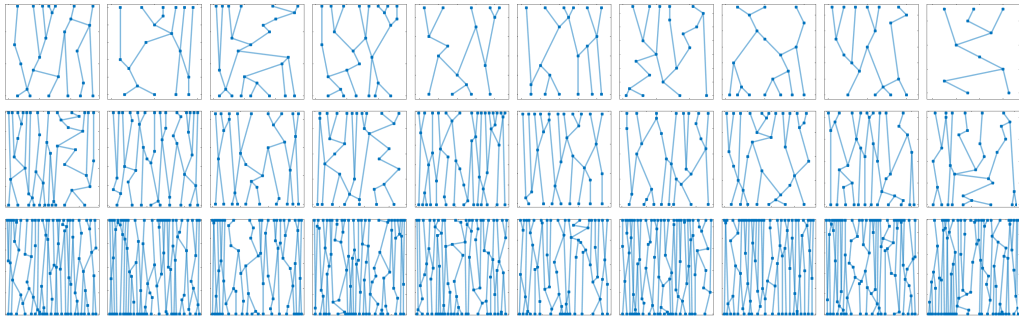

(d)  $(c_{\circlearrowleft}, c_{\circlearrowright}, c_{\circlearrowup}, c_{\circlearrowdown}) = (1/4, 1/4, 1/4, 1/4)$  with  $\mu = 10$  (top),  $\mu = 20$  (middle), and  $\mu = 40$  (bottom).

Figure 7: Samples drawn from permutree process with intensity  $\lambda(\cdot) = \mu \cdot \text{Leb}(\cdot)$  and decoration weights  $(c_{\circlearrowleft}, c_{\circlearrowright}, c_{\circlearrowup}, c_{\circlearrowdown})$ . Ten samples are generated for each parameter setting.

718 Section 3 (Figure 6) of the main text. From the fundamental properties of the Poisson process, the  
 719 vertical interval between two adjacent vertices at random locations follows an exponential distribution  
 720  $\text{Exp}(\mu)$ . Imagine the time evolution in the partition of a line segment of length 1 horizontally drawn  
 721 from bottom to top, as shown in Figure 6 (b). The time evolution of this partition can be viewed as a

722 Markov process with an intensity  $\mu$  and a time limit of 1. Furthermore, if we consider the horizontal  
723 location of the marked point process as the position where the line segment of length 1 is cut, we can  
724 consider this time evolution as a hierarchical partition of the line segment. Therefore, this can be  
725 regarded as a Mondrian process.

## 726 C Bayesian inference for phylogenetic permutree (omitted in Section 5)

727 This section reveals the Bayesian inference algorithm for phylogenetic permutree analysis using our  
728 permutree processes. For the sake of generality, we will use the marked point process representation  
729 described in Section 3 in particular as a permutree process. This argument can also be applied,  
730 with minor modifications, to the special case of the marked stick-breaking process (with its finite  
731 truncation) described in Section 4.

732 **Overview** - Standard Bayesian inference algorithms such as Markov chain Monte Carlo (MCMC)  
733 methods can be realized by sequentially iterating the following two update rules: (i) updating the  
734 permutree process (ii) updating the evolutionary model. Since the latter can be supported by standard  
735 inference methods to evolutionary models, it is the updating method of the former that is particularly  
736 important here. For the former, various inference algorithms that have been proposed for generic  
737 marked point processes and their extensions [68, 69, 26, 96, 43, 104, 30, 55, 31, 14, 35, 109] would be  
738 applicable, since the entity of the permutree process is a marked point process as shown in Section 3  
739 of the main text. This section describes a useful inference method that exploits an important property  
740 of Poisson processes, namely, that a certain Poisson process can be obtained by *thinning* operations  
741 from another Poisson process with higher intensity. Section C.1 provides a brief description of the  
742 *thinning* operation for the Poisson process as a preliminary to our MCMC method. Then, Section C.2  
743 once again writes down the whole generative probabilistic model, since it should be possible to see at  
744 a glance what the parameters to be inferred are in the permutree process and its phylogenetic tree  
745 described in Section 5. Finally, Section C.3 describes the MCMC inference algorithm.

### 746 C.1 Preliminaries: thinning operations for Poisson processes

747 Our MCMC method uses important properties of Poisson processes. Specifically, we will discuss  
748 how to represent a certain Poisson process via another Poisson process with higher intensity.

749 **Homogeneous Poisson process** - In this paper, we mainly consider *homogeneous* Poisson processes  
750 on  $[0, 1] \times [0, 1]$ , i.e., where the intensity function is given by a constant. A Poisson process on  
751  $[0, 1] \times [0, 1]$  with intensity  $\mu$  (where  $0 < \mu < \infty$ ) is a stochastic process for a random set of points,  
752 where the number of points belonging to  $(x_1, x_2] \times (y_1, y_2]$  follows a Poisson distribution with the  
753 parameter  $\mu(x_2 - x_1)(y_2 - y_1)$  for any  $0 \leq x_1 < x_2 \leq 1$ ,  $0 \leq y_1 < y_2 \leq 1$ . For notational  
754 simplicity, we will denote a Poisson process on  $[0, 1] \times [0, 1]$  with intensity  $\mu$  by  $\text{PP}(\mu, [0, 1] \times [0, 1])$ .  
755 We also recall that in the main text, we defined this homogeneous Poisson process as the Poisson  
756 process with the intensity function  $\lambda(\cdot) = \mu \cdot \text{Leb}(\cdot)$  as an equivalent expression, where  $\text{Leb}(\cdot)$   
757 indicates the Lebesgue measure.

758 **Thinning operation on Poisson processes** - One of the most interesting properties of Poisson  
759 processes is that a Poisson process with a certain intensity can be obtained by applying the *thinning*  
760 operation from a Poisson process with a higher intensity. More specifically, a Poisson process with  
761 intensity  $\mu$  can be constructed as follows:

- 762 (i) We generate a random set of points from a Poisson process with intensity  $\nu (> \mu)$ .
- 763 (ii) For each point generated, independently decide whether or not to accept it with probabili-  
764 ty  $\mu/\nu$ .
- 765 (iii) The set of only accepted points can be regarded as following the Poisson process with  
766 intensity  $\mu$ .

### 767 C.2 Full description of phylogenetic permutree with permutree process

768 As input observation data, we consider DNA (molecular) sequences  $\mathbf{x}_j$  ( $j = 1, \dots, N$ ) observed at  
769 letter length  $S$  over  $N$  species. For example, the sequence  $\mathbf{x}_j = \text{GAGTAC}$  has length  $S = 6$ . Figure  
770 8 (top) shows the observation DNA sequences as an  $S \times N$  matrix. The four colors represented

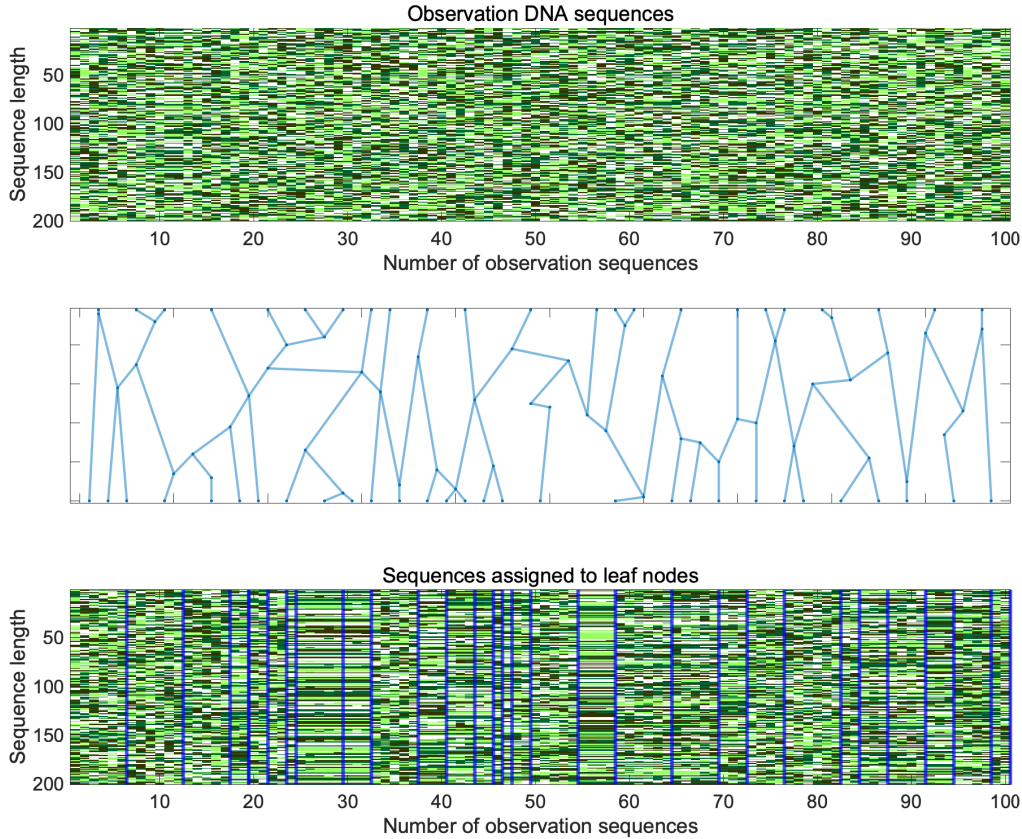

Figure 8: Observed DNA sequences (top), phylogenetic permutree (middle), and observed DNA sequences assigned to leaf nodes of phylogenetic permutree (bottom). Note that each leaf node (lower) of the phylogenetic permutree does not necessarily have to be the assignment of a single observation DNA sequence. The blue dividing line in the figure below represents a group of DNA sequences where each parcel corresponds to one leaf (lower) node. The phenomenon that each observed sequences within the same group is different is due to mutation events based on the evolutionary model.

771 by each element of the matrix correspond to the four different letters A,C,G, and T. We regard  
 772 these DNA sequences as following a phylogenetic tree based on a permutree. First, we generate the  
 773 marked points  $\{(l_i, m_i) : i = 1, 2, \dots, n\}$  and the corresponding permutree  $\mathbf{T}$  from the permutree  
 774 process. We recall that the transformation from marked points to permutree can be performed by  
 775 the transformation in Figure 9 (which we will call MPP2PT). Then, we represent coalescence,  
 776 recombination, multiple ancestry, and mutation events in genealogy by combining the four types of  
 777 the decorations  $\otimes, \oplus, \otimes, \ominus$  with the following interpretations:

- 778 • **Coalescence**  $\otimes$  - A coalescence event represents two lineages having a common ancestral  
 779 lineage.
- 780 • **Recombination**  $\oplus$  - A recombination event represents the joining of two exclusive sub-  
 781 sequences of two lineages by one lineage.
- 782 • **Partition**  $\otimes$  - We give the decoration  $\otimes$  the role of division so that a single permutree  
 783 can represent a phylogenetic tree with multiple ancestors. Specifically, we connect the  
 784 two left edges and similarly connect the two right edges to lead to two unconnected tree  
 785 structures on either side of decoration  $\otimes$ .
- 786 • **Backward in time**  $\ominus$  (optional) - We suppose that no mutation occurs when going back  
 787 in time from a vertex to a vertex with  $\ominus$ .

788 Figure 10 shows an intuitive illustration of the above interpretation of the transformation from a  
789 permutree  $\mathbf{T}$  to a phylogenetic permutree  $\mathcal{T}$ . We will refer to this transformation as PT2PP :  $\mathbf{T} \mapsto \mathcal{T}$ .  
790 Here, we will use the vertical coordinate  $l_{i,2}$  of each marked point as a representation of how far  
791 back in time each vertex is in the phylogenetic tree. Each vertex  $v$  of the phylogenetic tree  $\mathcal{T}$  shall  
792 have a hidden DNA sequence  $\mathbf{h}_v$  (i.e., a sequence of length  $S$  with each element having the letter  
793 from A,C,G, and T), which shall mutate according to the gene evolutionary models, such as the  
794 Jukes-Cantor model (JC) [40] and the generalized time reversible model (GTR) [91]. Figures 11 and  
795 12 show examples of the evolution of the hidden DNA sequences  $(\mathbf{h}_v)_{v \in \mathcal{T}}$  (e.g., sequence length  
796  $S = 10$ ) on the phylogenetic tree  $\mathcal{T}$  in the mutation-prone and mutation-resistant cases, respectively.  
797 For notational convenience, we will denote the gene evolutionary models with mutation rate  $\alpha (> 0)$   
798 on the phylogenetic tree  $\mathcal{T}$  and mark locations  $l_1, \dots, l_n$  by  $\text{Evo}(\mathcal{T}, (\mathbf{l}_i)_{i=1}^n, \alpha)$ . Finally, each of the  
799  $N$  input sequences is independently assigned to a data path from the two-table Chinese restaurant  
800 process (referred to as 2tCRP) with the concentration parameter  $\gamma > 0$ . In short, the overall model  
801 can be summarized as follows:

$$l_1, l_2, \dots, l_n \sim \text{PP}(\mu, [0, 1] \times [0, 1]) \quad : \text{Locations} \quad (7)$$

$$(c_{\text{D}}, c_{\text{O}}, c_{\text{Q}}, c_{\text{N}}) \sim \text{Dirichlet}(\epsilon/4, \epsilon/4, \epsilon/4, \epsilon/4) \quad : \text{Decoration weights} \quad (8)$$

$$m_i \sim \text{Categorical}(c_{\text{D}}, c_{\text{O}}, c_{\text{Q}}, c_{\text{N}}) \quad : \text{Marks} \quad (9)$$

$$\mathbf{T} \leftarrow \text{MPP2PT}((\mathbf{l}_i, m_i)_{i=1}^n) \quad : \text{Permutree} \quad (10)$$

$$\mathcal{T} \leftarrow \text{PT2PP}(\mathbf{T}) \quad : \text{Phylogenetic permutree} \quad (11)$$

$$\alpha \sim \text{Gamma}(\epsilon', \epsilon') \quad : \text{Mutation Rate} \quad (12)$$

$$(\mathbf{h}_v)_{v \in \mathcal{T}} \sim \text{Evo}(\mathcal{T}, (\mathbf{l}_i)_{i=1}^n, \alpha) \quad : \text{DNA evolution} \quad (13)$$

$$Z_1, \dots, Z_N \sim \text{2tCRP}(\gamma) \quad : \text{Data paths} \quad (14)$$

$$\mathbf{x}_j \sim \text{Evo}(\mathcal{T}|_{Z_j}, \mathbf{l}_{Z_j}, \alpha) \quad : \text{Observation sequence} \quad (15)$$

802 for  $i = 1, 2, \dots, n$  and  $j = 1, \dots, N$ , where  $\mathcal{T}|_{Z_j}$  refers to a phylogenetic tree (a tree consisting  
803 of one edge and two vertices at either end) from which only the leaf nodes and their children are  
804 extracted from the phylogenetic tree  $\mathcal{T}$ . Since the variables  $\epsilon$  and  $\epsilon'$  are hyperparameters for the  
805 non-informative prior distributions, it is standard to use them fixed to tiny values. Can we then  
806 consider how to directly infer the above generative probability model? Certainly, it is possible in  
807 principle to infer the above generative probability model as it is by direct updating of the permutree  
808 process as shown in Figure 13. However, in such direct inference, the complexity  $n$  is often strongly  
809 affected by bad local modes, and often the Markov chain is entangled in the local optima, resulting in  
810 slow convergence. Therefore, using the properties of Poisson processes described in the preparation,  
811 a method can be considered to reduce the influence of such local optima by taking the dare to have  
812 redundant model parameters. Equation (7) and (9) can be rewritten as follows.

$$\hat{l}_1, \hat{l}_2, \dots, \hat{l}_K \sim \text{PP}(\mu, [0, 1] \times [0, 1]) \quad : \text{Redundant locations} \quad (16)$$

$$\hat{m}_i \sim \text{Categorical}(c_{\text{D}}, c_{\text{O}}, c_{\text{Q}}, c_{\text{N}}) \quad : \text{Redundant marks} \quad (17)$$

$$b_i \sim \text{Bernoulli}(\mu/\nu) \quad : \text{Binary indicators} \quad (18)$$

$$l_1, l_2, \dots, l_n \leftarrow \left\{ \hat{l}_1, \dots, \hat{l}_K \mid b_i = 1 \ (i = 1, \dots, K) \right\} \quad : \text{Locations} \quad (19)$$

$$m_1, m_2, \dots, m_n \leftarrow \left\{ \hat{m}_1, \dots, \hat{m}_K \mid b_i = 1 \ (i = 1, \dots, K) \right\} \quad : \text{Marks} \quad (20)$$

813 for  $i = 1, \dots, K$ . The above is the full phylogenetic tree model based on the permutree. One point to  
814 recall here is that permutrees includes binary trees and Cambrian trees as special cases (as discussed  
815 in Remark 2.1 of the main text). Therefore, the permutree process can be attributed to various  
816 models by adjusting the prior distribution for the decoration weights  $(c_{\text{D}}, c_{\text{O}}, c_{\text{Q}}, c_{\text{N}})$ . Figure 14 (left)  
817 shows the permutree process with  $(c_{\text{D}}, c_{\text{O}}, c_{\text{Q}}, c_{\text{N}}) \sim \text{Dirichlet}(\epsilon/2, 0, 0, \epsilon/2)$  as BINARYTREE  
818 (restricting the expressive power to binary trees). Figure 14 (right) shows  $(c_{\text{D}}, c_{\text{O}}, c_{\text{Q}}, c_{\text{N}}) \sim$   
819  $\text{Dirichlet}(\epsilon/3, 0, \epsilon/3, \epsilon/3)$  as CAMBRIANTREE (restricting it to Cambrian trees).

820 **Joint probability** - For notational convenience, we use  $\mathbf{X} := (\mathbf{x}_1, \dots, \mathbf{x}_N)$ ,  $\mathbf{H} := (\mathbf{h}_v)_{v \in \mathcal{T}}$ ,  
821  $\mathbf{Z} := (Z_1, \dots, Z_N)$ ,  $\mathbf{b} := (b_1, \dots, b_K)$ ,  $\hat{\mathbf{L}} := (\hat{l}_1, \dots, \hat{l}_K)$ ,  $\hat{\mathbf{m}} := (\hat{m}_1, \dots, \hat{m}_K)$ , and  $\mathbf{c} =$

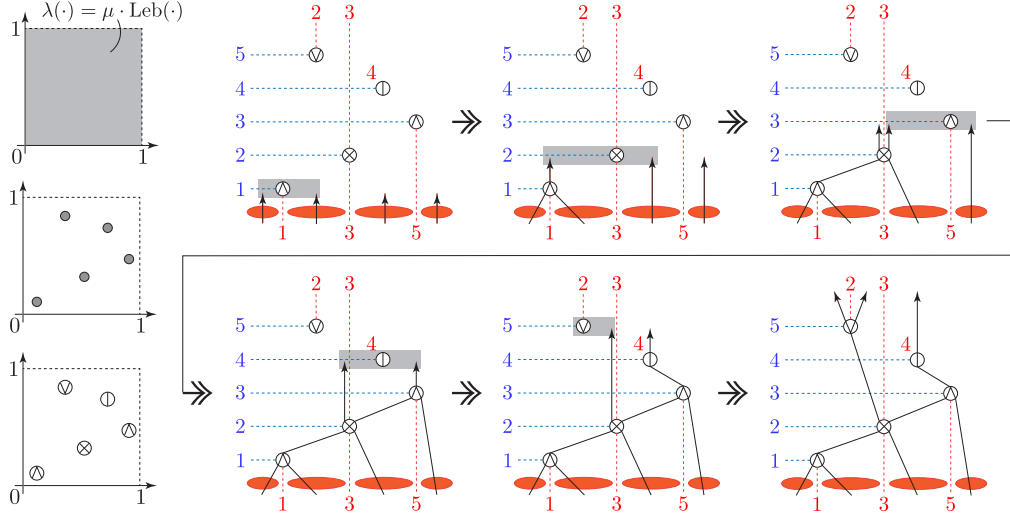

Figure 9: (Reprinted from the main text.) **Left: Marked point process** - We introduce an intensity function  $\lambda$  (e.g., uniform measure) on the plane  $[0, 1] \times [0, 1]$  (top figure). Then, we generate random locations  $l_1, \dots, l_n$  from the Poisson point process of the intensity  $\lambda$  (middle figure). Finally, for each random location, we independently assign one of the decorations  $\{\ominus, \otimes, \odot, \oplus\}$  from the uniform categorical distribution as a random mark  $m_i$  ( $i = 1, \dots, n$ ) (bottom figure). The resulting marked point process  $\{(l_i, m_i) : i = 1, 2, \dots, n\}$  can be regarded as a random *decorated permutation*. **Right: Transformation to random permuto-tree** - Note that the marked points generated from the marked point process can be considered as a decorated permutation by noting its horizontal and vertical ordering. Since decorated permutations and leveled permuto-trees have a one-to-one correspondence, we are guaranteed to be able to construct their bijective transformation. First, auxiliary lines (red dashed lines) are drawn below decorations  $\otimes, \oplus$  and above decorations  $\otimes, \odot$ . From this point on, we will extend the permuto-tree edges, but it is important to emphasize that the permuto-tree edges do not cross these auxiliary lines. Next, if we look at the auxiliary lines extending all the way to the bottom, we can see that this divides the lower region into smaller sub-regions (indicated by the red oval). Then, one edge is extended from each sub-region. The edges are extended from bottom to top, and when the height of each vertex is reached, the edges adjacent to that vertex are connected (indicated by the gray boxes). This is done until all vertices are covered, resulting in a *leveled permuto-tree*. Finally, if we forget about the vertical position of each vertex in the leveled permuto-tree and focus only on its structure as a directed tree, we obtain the corresponding *permuto-tree*.

822  $(c_{\odot}, c_{\otimes}, c_{\oplus}, c_{\ominus})$ . We obtain the following joint probability density function:

$$\begin{aligned}
 P_{\text{joint}}(\mathbf{X}, \mathbf{H}, \mathbf{b}, \mathbf{Z}, \hat{\mathbf{L}}, \hat{\mathbf{m}}, \mathbf{c}) &= P_{\text{obs}}(\mathbf{X}; \hat{\mathbf{L}}, \hat{\mathbf{m}}, \mathbf{b}, \mathbf{z}, \alpha) \cdot P_{\text{evo}}(\mathbf{H}; \hat{\mathbf{L}}, \hat{\mathbf{m}}, \mathbf{b}, \alpha) \\
 &\quad P_{\text{PP}}(\hat{\mathbf{L}}; \nu) \cdot P_{\text{Bernoulli}}(\mathbf{b}; \mu/\nu) \cdot P_{\text{Categorical}}(\hat{\mathbf{m}}; \mathbf{c}) \\
 &\quad \cdot P_{\text{Dirichlet}}(\mathbf{c}; \epsilon) \cdot P_{\text{Gamma}}(\alpha; \epsilon') \cdot P_{\text{2tCRP}}(\mathbf{Z}; \gamma), \quad (21)
 \end{aligned}$$

823 where  $P_{\text{obs}}$  is the probability density function (PDF) of Equation (15),  $P_{\text{evo}}$  is PDF of Equation (13),  
 824  $P_{\text{PP}}$  is PDF of Equation (16), and subsequent terms are PDFs of the standard distributions. The  
 825 posterior distribution of the parameters  $\mathbf{H}, \mathbf{b}, \mathbf{w}, \mathbf{z}, \hat{\mathbf{L}}, \hat{\mathbf{m}}, \mathbf{c}$  to be estimated is proportional to this  
 826 joint probability density.

### 827 C.3 Bayesian inference algorithm for phylogenetic permuto-tree

828 We can construct the MCMC algorithm by iteratively repeating the following update rules for the  
 829 DNA evolution  $\mathbf{H}$  on the phylogenetic permuto-tree, the binary indicators  $\mathbf{b}$ , the leaf node weights  $\mathbf{w}$ ,  
 830 the observation assignments  $\mathbf{z}$ , the redundant locations  $\hat{\mathbf{L}}$ , the redundant marks  $\hat{\mathbf{m}}$ , and the decoration  
 831 weights  $\mathbf{c}$ .

832 **Update rule for DNA evolution  $\mathbf{H}$**  - We recall that each element of the matrix  $\mathbf{H} = (H_{s,j})_{S \times N}$   
 833 consists of one of the letters A, C, G, or T. Using Equation (21), we calculate the joint probability that

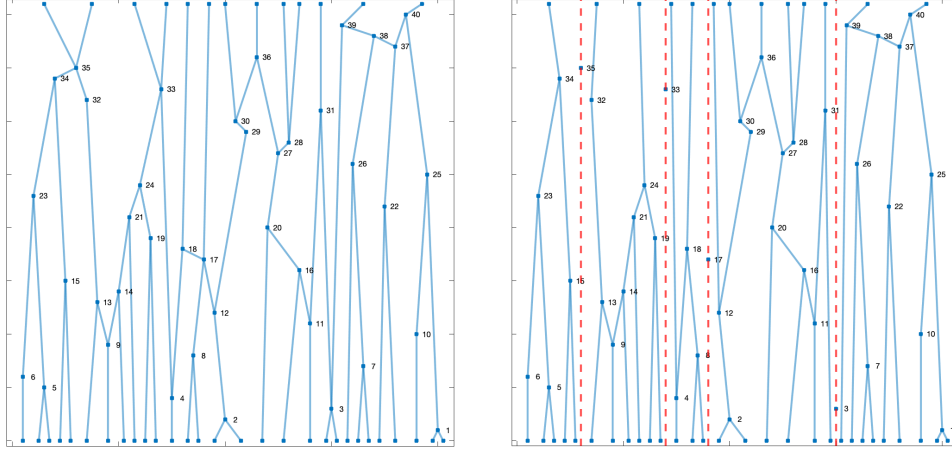

Figure 10: Intuitive illustration of transformation PT2PP from permutree (**left**) to phylogenetic permutree (**right**). The number assigned to each vertex  $\mathbf{v}$  represents the function  $q(\mathbf{v})$  (i.e., the order of the vertices vertically from bottom to top). We can regard this transformation as giving the role of the partition (red dotted line in the right figure) to the decoration  $\otimes$  (i.e., the vertex with two parents and two children in the left figure).

834 each element  $H_{s,j}$  is **A**, **C**, **G**, or **T**, respectively, and let  $p_A$ ,  $p_C$ ,  $p_G$ , or  $p_T$  denote them respectively.  
 835 Then we obtain the following Gibbs update rule:

$$H_{s,j} \sim \text{Categorical}(p_A, p_C, p_G, p_T) \quad (s = 1, \dots, S, \text{ and } j = 1, \dots, N) \quad (22)$$

836 **Update rule for binary indicators  $b$**  - For each  $i = 1, \dots, K$ , we can obtain the Gibbs update rule  
 837 derived by calculating the posterior probability ratio for  $b_i = 0$  and  $b_i = 1$  using Equation (21).  
 838 Specifically, we suppose that the value of the joint density for  $b_i = 0$  is  $\pi_0$  and the value for  $b_i = 1$  is  
 839  $\pi_1$ , and then we obtain the following update rule:

$$b_i \sim \text{Bernoulli}(\pi_1 / (\pi_0 + \pi_1)) \quad (i = 1, \dots, K). \quad (23)$$

840 **Update rule for leaf node weights  $w$**  - From the conjugacy of the Dirichlet and Categorical  
 841 distributions, we obtain the following Gibbs update rule:

$$(w_1 \dots, w_{|\mathcal{LN}(\mathcal{T})|}) \sim \text{Dirichlet}(\mathcal{N}_1 + \epsilon'', \dots, \mathcal{N}_{|\mathcal{LN}(\mathcal{T})|} + \epsilon'') \quad (i = 1, \dots, K), \quad (24)$$

842 where  $\mathcal{N}_i$  ( $i = 1, \dots, |\mathcal{LN}(\mathcal{T})|$ ) indicates the number of the observation sequences  $\mathbf{x}_j$  ( $j =$   
 843  $1, \dots, N$ ) which is assigned to the  $i$ th leaf node of the phylogenetic permutree  $\mathcal{T}$ .

844 **Update rule for observation assignments  $z$**  - Using Equation (21), we calculate the joint probability  
 845 that each observation sequence  $\mathbf{x}_j$  ( $j = 1, \dots, N$ ) is assigned to the  $i$ th ( $i = 1, \dots, |\mathcal{LN}(\mathcal{T})|$ ) leaf  
 846 node of the phylogenetic permutree  $\mathcal{T}$ , and let  $\bar{w}_i$  denote it. Then we obtain the following Gibbs  
 847 update rule:

$$z_j \sim \text{Categorical}(\bar{w}_1, \dots, \bar{w}_{|\mathcal{LN}(\mathcal{T})|}) \quad (j = 1, \dots, N) \quad (25)$$

848 **Update rule for redundant locations  $\hat{L}$**  - We use the simple Metropolis-Hastings (MH) method.  
 849 For each position, we generate a new candidate sample from the normalized probability measure  $\hat{\lambda}$   
 850 of the intensity function  $\lambda$ , that is,  $\hat{l}_i \sim \hat{\lambda}$  ( $i = 1, \dots, K$ ), and decide whether to adopt it through the  
 851 MH acceptance/rejection scheme using Equation (21).

852 **Update rule for redundant marks  $\hat{m}$**  - Using Equation (21), we calculate the joint probability  
 853 that each element  $\hat{m}_i$  has  $\ominus$ ,  $\otimes$ ,  $\oplus$ , respectively, and let  $p_{\ominus}$ ,  $p_{\otimes}$ ,  $p_{\oplus}$  denote them respectively.  
 854 Then we obtain the Gibbs update rule:

$$\hat{m}_i \sim \text{Categorical}(p_{\ominus}, p_{\otimes}, p_{\oplus}) \quad (i = 1, \dots, K) \quad (26)$$

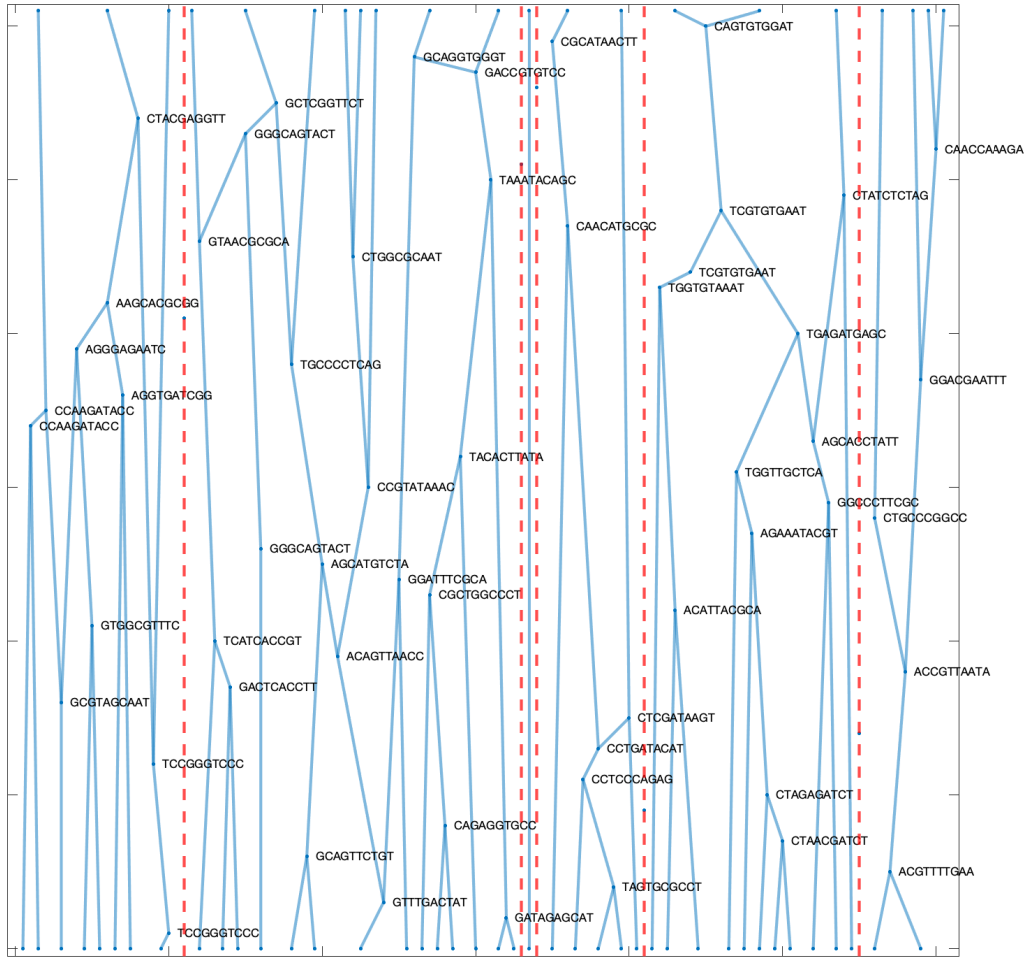

Figure 11: Phylogenetic trees and DNA evolution through Jukes-Cantor evolutionary model with mutation rate  $\alpha = 0.1$ .

855 **Update rule for decoration weights  $c$**  - From the conjugacy of the Dirichlet and Categorical  
 856 distributions, we obtain the following Gibbs update rule:

$$(c_{\emptyset}, c_{\circledast}, c_{\otimes}, c_{\oplus}) \sim \text{Dirichlet}(\mathcal{N}_{\emptyset} + \epsilon/4, \mathcal{N}_{\circledast} + \epsilon/4, \mathcal{N}_{\otimes} + \epsilon/4, \mathcal{N}_{\oplus} + \epsilon/4), \quad (27)$$

857 where  $\mathcal{N}_{*}$  ( $* \in \{\emptyset, \circledast, \otimes, \oplus\}$ ) indicates the number of the marks  $\hat{m}_i$  ( $i = 1, \dots, K$ ) which has the  
 858 decoration  $*$ .

#### 859 C.4 Empirical impact of finite truncation

860 To investigate the empirical impact of finite censoring on the marked stick-breaking process described  
 861 in Section 4, we report in Figure 15 the prediction performance for different levels of finite censoring,  
 862  $K = 25, 50, 100$  and  $150$ , in the same experimental setup as in the main text (Section 5). It can be  
 863 seen that when the level of finite truncations is extremely restricted, the prediction performance has  
 864 been reduced, while when some level of censoring is ensured, the prediction performance is not so  
 865 reduced. This can be seen as reflecting the fact that the marked stick-breaking process can adjust its  
 866 own real model complexity in a data-driven manner according to the observation data.



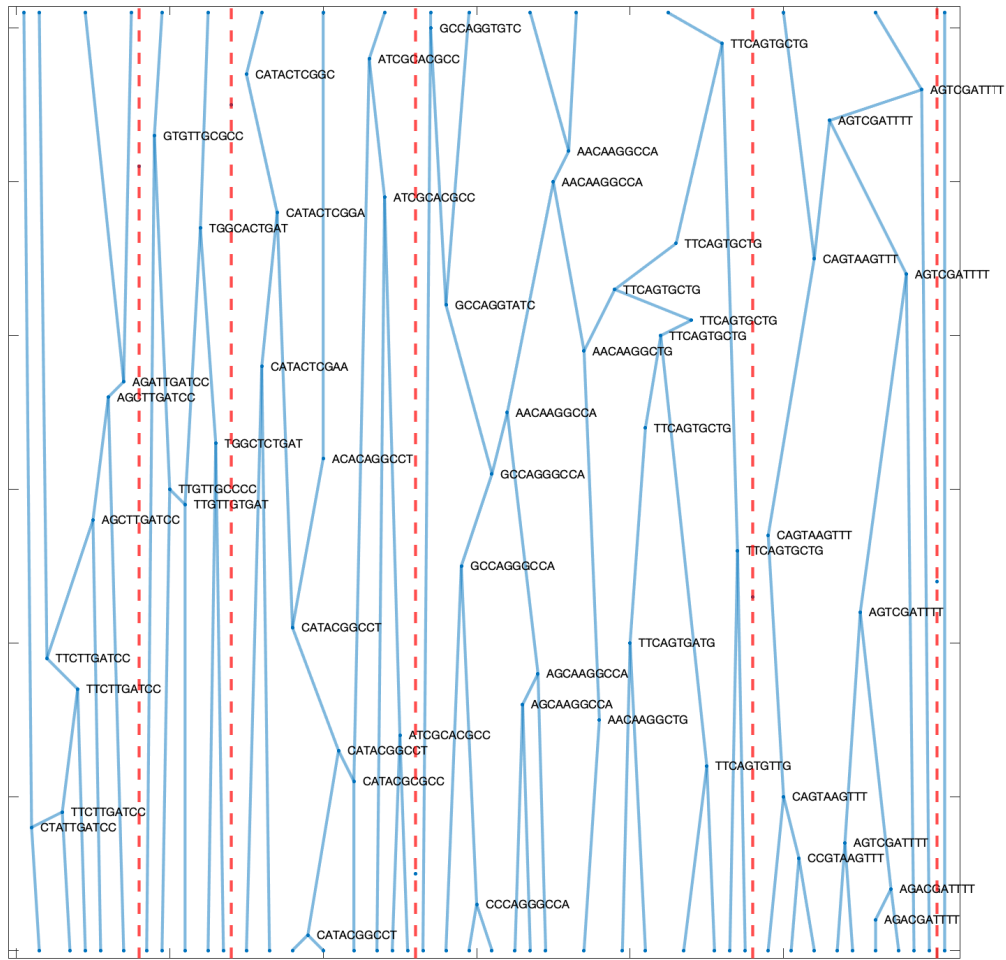

Figure 12: Phylogenetic trees and evolution of DNA lineages through Jukes-Cantor evolutionary model with mutation rate  $\alpha = 0.001$  (i.e., a situation where mutations are almost unlikely to occur).

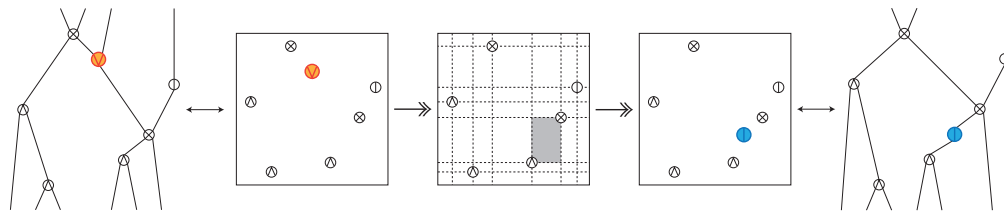

Figure 13: Illustration of simplest inference method for permutree process as marked point process. The current leveled permutree in Markov chain Monte Carlo inference corresponds to a certain state of the marked point process (**left**). One marked point (slightly enlarged and colored red) is chosen to be a candidate for updating. The region to be updated is quantized (**center**) to generate a new candidate marked point (slightly enlarged and colored blue) from the conditional posterior probability (or some proposal distribution). Finally, the generated new marked points are updated or not by the Metropolis-Hastings scheme, which is the next state of the Markov chain (**right**).

## 867 D Remaining challenges

868 The main difficulty in applying the permutree process to data modeling is how to handle its unlimited  
 869 finite or infinite model complexity (i.e., number of vertices). Roughly speaking, it is not possible  
 870 in principle to naively implement a model with infinite parameters on current computers. This is a

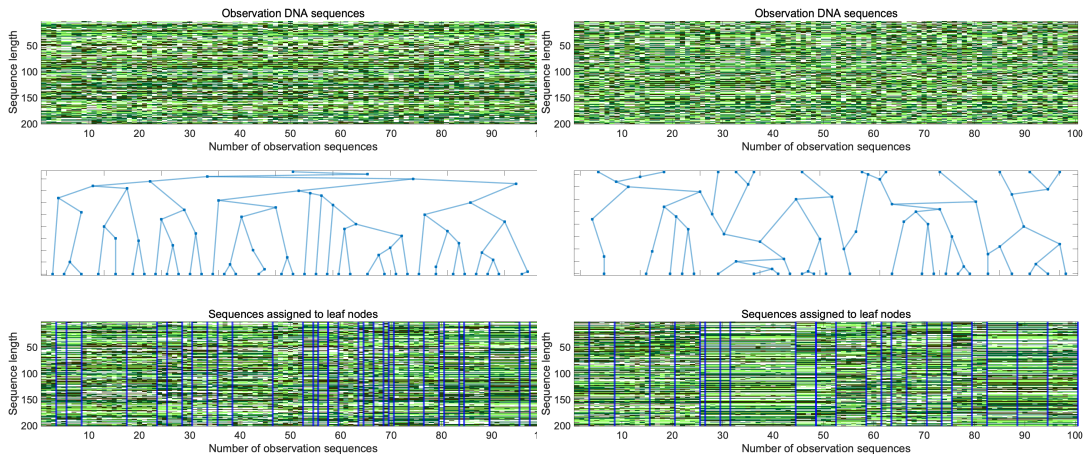

Figure 14: Binary tree (**left**) and Cambrian tree (**right**) attributed from permutree by restricting decoration weights.

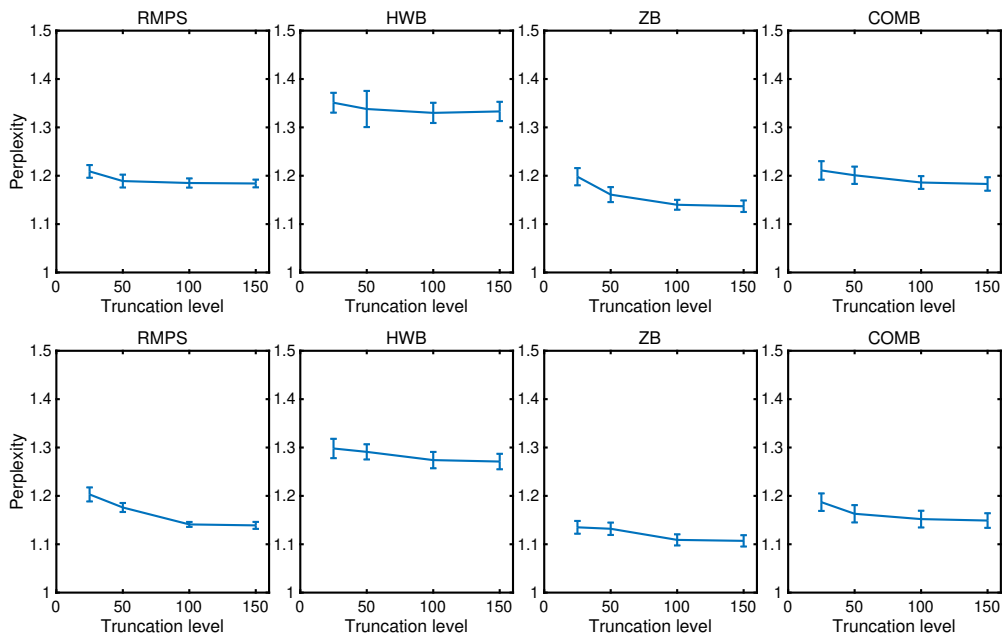

Figure 15: Effect of prediction performance on finite truncation level  $K = 25, 50, 100$  and  $150$  of marked stick-breaking process.

871 central topic in the BNP field, and we have historically had two policies. One is to represent models  
 872 of infinite complexity such that finite truncation works reasonably well. This corresponds just to  
 873 the representation methods for the stick-breaking process [89] in Dirichlet process infinite mixture  
 874 models [79] and the beta-Bernoulli process in infinite factor models [95, 93]. The other method is a  
 875 model representation in which, in conjunction with the finite amount of observed data, the model  
 876 activates only as many of the potentially infinite number of parameters as necessary. This corresponds  
 877 to the Chinese restaurant process [74, 76] in the mixture models or the Indian buffet process [29] in  
 878 the factor models. While Section 4 focuses on the former policy, this section will explore the latter.

### 879 D.1 Preliminary: ordered Chinese restaurant process

880 We begin our discussion with a representation using oCRP for binary trees, a special case of  
 881 permutrees. Let  $\theta > 0$  be the concentration parameters and  $\alpha > 0$  the discount parameter. We will  
 882 now take a so-called *spinal decomposition* (Figure 16 left) of the binary tree. In the metaphor of CRP,

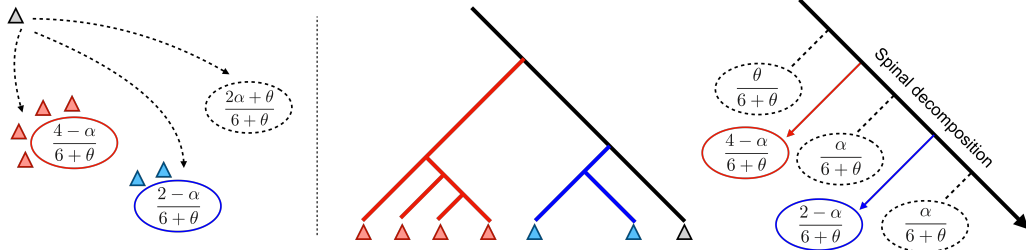

Figure 16: Standard Chinese restaurant process (left) for random partition and “ordered” Chinese restaurant process for random binary tree.

883 the customer can be viewed as as seeking a dish at the terminal node of the binary tree. The new  
 884 customer can then either proceed to the existing subtree or create a new branch on one of the edges,  
 885 according to the proportions shown in Figure 16 right. This can be viewed as CRP with random  
 886 ordering of the CRP tables.

887 **Ordered Chinese restaurant process (oCRP)** [77, 85] - This stochastic process is a generative  
 888 prbabilistic model that constructs a random binary tree by means of a recursive structure as follows.  
 889 Let  $\alpha$  and  $\theta$  be the *discount* parameter and the *concentration* parameter, respectively.

- 890 • The first customer goes straight from the root to form one terminal node.
- 891 • The second customer forms a split between the root and the terminal node where the first  
 892 customer is located. At this stage, the advanced subtree of the second customer is assigned  
 893 a weight of  $1 - \alpha$  and each edge of the split spinal cord is assigned a weight of  $\alpha$  and  $\theta$ ,  
 894 respectively.
- 895 • The third and subsequent guests determine their own destination according to the proportion  
 896 of weights assigned to the subtree and each edge on the spinal cord. If it chooses an edge on  
 897 the spinal cord, it creates a new branch there to become a subtree and assigns weight  $\alpha$  to  
 898 the newly created edge on the spinal cord. If it moves on to an existing subtree, it recursively  
 899 determines its own destination according to the nested oCRPs on that subtree and adds 1 to  
 900 the weight of the subtree.

901 One will notice that this stochastic process is very similar to the standard Chinese restaurant process  
 902 (CRP). If each subtree is considered a table, the probability that a new customer will sit at an existing  
 903 table is proportional to the weight of the number of customers already sitting at that table minus  
 904 the discount parameter  $\alpha$ . It will be seen that this is the same situation as in the standard CRP  
 905 corresponding to the well-known Pitman-Yor process [76]. However, it differs from the standard CRP  
 906 in that when a new table is seated, that table is determined by reference to the order of the existing  
 907 tables. For this reason, this stochastic process is called an “ordered” CRP.

908 One of the most important properties of oCRPs is *exchangeability*:

909 **Theorem D.1** (Proposition 1 (a) [77]). *A random binary tree generated by the nested oCRPs with the*  
 910 *discount parameter  $\alpha$  and the concentration parameter  $\theta$  has exchangeable leaf labels for all  $n \neq 1$*   
 911 *if and only if  $\alpha = \theta = 1/2$ .*

## 912 D.2 Our attempt: Chinese restaurant street

913 **Strategy sketch and advance notice** - Recalling the requirements of (C1) and (C2) for the definition  
 914 of permutrees (Section 2), we could introduce the following metaphor of CRP (See also Figure 17):

- 915 • Each *customer* is looking for a *dish* in a *Chinese restaurant street* and prefers a street that is popular  
 916 with other customers, but is also willing to explore new streets on a whim. The development of the  
 917 streets, with one customer after another searching for a dish, represents the permutree evolution.
- 918 • The Chinese restaurant street has a recursive structure. The *boulevard* (main street) has *side*  
 919 *streets*, and each side street becomes the next boulevard, with its own next side streets recursively.  
 920 This recursive structure would be reminiscent of an existing oCRP or nested CRP that recursively  
 921 calls smaller CRPs in the overall process. When a side street becomes a cross street, it represents  
 922 a vertex with  $\otimes$ . If the side street extends only one way, it corresponds to a vertex with  $\odot$  or  $\ominus$ .

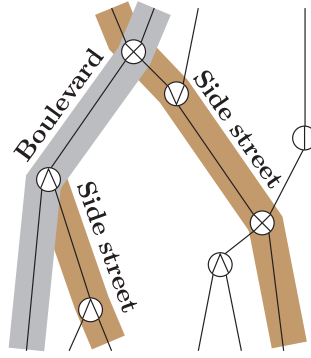

Figure 17: Overview of Chinese restaurant street

923 **Chinese restaurant street (CRS)** - CRS is given by the recursive structure of the streets, consisting  
 924 of boulevards and side streets. Let  $\theta_1 > 0$  and  $\theta_2 \geq 0$  be the *concentration* parameters and  $\alpha > 0$   
 925 the discount parameter. Figure 18 illustrates the situation where a new boulevard is a small CRS in  
 926 a large CRS with the recursive structure. A CRS at a certain level consists of a boulevard and side  
 927 streets, where each side of the boulevard is weighted by the concentration parameters  $\theta_1, \theta_2$  and the  
 928 discount parameter  $\alpha$ , and each side street is assigned a weight equal to the number of customers who  
 929 proceeded to it minus the discount parameter  $\alpha$ . When the next customer enters this boulevard, the  
 930 next destination is determined according to the ratio of those weights. It would have been a wishful  
 931 idea if this vanilla CRS could be used as a permutree model, but unfortunately, it does not satisfy the  
 932 requirements (C1) and (C2) as it is.

933 **Properties** - (1) The most important feature of CRS is that it is an extension of the existing oCRP.  
 934 Specifically, in the case of  $\theta_2 = 0$  (i.e., a situation where both boulevards and side streets grow only  
 935 to one side), CRS is equivalent to oCRP for random binary trees. (2) Another important property  
 936 is *exchangeability* (i.e., invariance of probabilities with respect to the order in which customers  
 937 enter the process), which is often the case with variants of CRPs. For our CRS, we can show that  
 938 it is *exchangeable* in the case of  $\alpha = \theta_1 + \theta_2 = 1/2$ , inheriting the result of exchangeability [77,  
 939 Proposition 1] of oCRP. This property would be helpful in Bayesian inference.

940 **Theorem D.2.** *A random tree generated CRS with the discount parameter  $\alpha$  and the two concentration*  
 941 *parameters  $\theta_1$  and  $\theta_2$  (described in Section 3.2 of the main text) has exchangeable leaf labels for all*  
 942  *$n \neq 1$  if and only if  $\alpha = \theta_1 + \theta_2 = 1/2$ .*

943 *Proof.* This can be verified by inheriting the exchangeability of oCRPs described in Theorem D.1.  
 944 We shall consider each subtree in oCRP as a table and assign natural numbers of labels to the tables,  
 945 starting from 1 according to the order in which the tables were generated. By reducing the resolution  
 946 of the leaf labels in Theorem D.1 to table labels, the ordered tables generated by oCRP are also  
 947 exchangeable. Then, for the random tree generated by CRS, if we consider each subtree as a table  
 948 and set  $\theta_1 + \theta_2 = \theta$ , this is also attributed to the random ordered tables of oCRP with the discount  
 949 parameter  $\alpha$  and the concentration parameter  $\theta$ . Thus, by repeatedly applying the fact that the table  
 950 labels of oCRP are exchangeable only when  $\alpha = \theta = \theta_1 + \theta_2 = 1/2$ , until each table eventually  
 951 becomes a leaf node, we can confirm that the CRS has exchangeable leaf labels.  $\square$

## 952 E Validity of transformation from marked points to permutree

953 This section verifies that the marked points  $\{(l_i, m_i) : i = 1, 2, \dots, n\}$  generated from the marked  
 954 point process are correctly transformed into permutrees by the algorithm in Figure 9 (Algorithm 1 of  
 955 the main text). This can be verified by the following procedure, which is similar to the method in the  
 956 proof of Proposition 8 in [75].

- 957 (i) There is exactly one strand in each section separated along the auxiliary line (the red dotted  
 958 line in Figure 9). This can be shown by mathematical induction on the number of nodes in  
 959 the permutree.
- 960 (ii) The graph created by the algorithm in Figure 9 has no cycles. This can be shown by using the  
 961 proof by contradiction. If the graph had cycles, it would cross the red dotted line. However,  
 962 by construction, the graph never crosses the red dotted line.

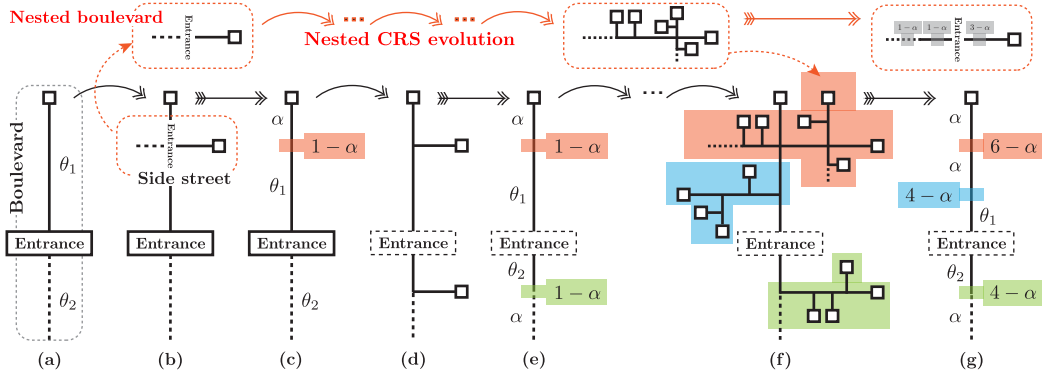

Figure 18: **Generative model of Chinese restaurant street** - (a): Suppose a customer encounters a new boulevard. The boulevard has a *forward* road and a *backward* road on both sides of it with an entrance in between. When the new boulevard is opened up, which direction is the forward or backward road is determined with probability  $1/2$ . The figure shows the case where the forward road is up. Given two *concentration* parameters  $\theta_1 > 0$  and  $\theta_2 \geq 0$ , the first customer to enter through the entrance chooses the forward road with probability  $\theta_1/(\theta_1 + \theta_2)$ , otherwise the backward road, and receives the dish being served at the end. We assign weights  $\theta_1$  and  $\theta_2$  to the forward and backward roads, respectively. At this stage, the one that the customers did not choose between the forward and backward roads (the lower backward road, represented by the dashed line in the figure) has not yet been activated. Until both the forward and backward roads are activated, the entrance itself serves as another endpoint of this boulevard. (b): The next customer coming to this boulevard, entering through the entrance to this boulevard, will proceed to the side street on that side in the proportion according to the weights assigned to each side. This side street itself corresponds to the boulevard in the next smaller CRS in the recursive structure. That is, the forward direction of this side street (i.e., whether it extends to the left or right first in the figure) is determined by this customer with probability  $1/2$ . The concept of whether the forward or backward road is chosen first on each side street determines whether the vertex corresponding to this side street in the permutree structure extends initially to the parent side or to the child side. (c): Given a discount parameter  $\alpha \geq 0$ , this side street is assigned a weight of  $1 - \alpha$ , which is the number of customers who have taken the side street minus the discount parameter  $\alpha$ . The edge divided by the side street is assigned a weight of the discount parameter  $\alpha$ . (d)-(e): When the next customer decides where to go based on the ratio of weights assigned to edges and side streets, she/he may choose an inactive road (dashed line in (c)). In that case, after the new side street is added (which also releases the entrance termination facility), the backstreet beyond it (dashed line in (d)) will continue to remain inactive. (f)-(g): The above procedures are repeated sequentially and recursively.

963 (iii) From (i) and (ii), the graph generated by the algorithm in Figure 9 is a tree, and furthermore,  
 964 since the red dotted line separates the left and right ancestor and descendant sub-trees, this  
 965 is a leveled permutree.

966 **NeurIPS Paper Checklist**

967 **1. Claims**

968 Question: Do the main claims made in the abstract and introduction accurately reflect the  
969 paper’s contributions and scope?

970 Answer: [Yes]

971 **2. Limitations**

972 Question: Does the paper discuss the limitations of the work performed by the authors?

973 Answer: [Yes]

974 Justification: Section 6 clarifies the limitations and remaining challenges.

975 **3. Theory Assumptions and Proofs**

976 Question: For each theoretical result, does the paper provide the full set of assumptions and  
977 a complete (and correct) proof?

978 Answer: [Yes]

979 Justification: Appendix A provides all details for theoretical statements in Section 4.

980 **4. Experimental Result Reproducibility**

981 Question: Does the paper fully disclose all the information needed to reproduce the main ex-  
982 perimental results of the paper to the extent that it affects the main claims and/or conclusions  
983 of the paper (regardless of whether the code and data are provided or not)?

984 Answer: [Yes]

985 Justification: Appendix C provides all details for our Bayesian inference algorithms.

986 **5. Open access to data and code**

987 Question: Does the paper provide open access to the data and code, with sufficient instruc-  
988 tions to faithfully reproduce the main experimental results, as described in supplemental  
989 material?

990 Answer: [Yes]

991 **6. Experimental Setting/Details**

992 Question: Does the paper specify all the training and test details (e.g., data splits, hyper-  
993 parameters, how they were chosen, type of optimizer, etc.) necessary to understand the  
994 results?

995 Answer: [Yes]

996 **7. Experiment Statistical Significance**

997 Question: Does the paper report error bars suitably and correctly defined or other appropriate  
998 information about the statistical significance of the experiments?

999 Answer: [Yes]

1000 **8. Experiments Compute Resources**

1001 Question: For each experiment, does the paper provide sufficient information on the com-  
1002 puter resources (type of compute workers, memory, time of execution) needed to reproduce  
1003 the experiments?

1004 Answer: [Yes]

1005 **9. Code Of Ethics**

1006 Question: Does the research conducted in the paper conform, in every respect, with the  
1007 NeurIPS Code of Ethics <https://neurips.cc/public/EthicsGuidelines?>

1008 Answer: [Yes]

1009 **10. Broader Impacts**

1010 Question: Does the paper discuss both potential positive societal impacts and negative  
1011 societal impacts of the work performed?

1012 Answer: [Yes]

1013 Justification: In general, phylogenetic tree analysis can sometimes have significant impacts  
1014 in our daily lives. For example, during the SARS-CoV-2 pandemic, it has recently been  
1015 used to analyze the spread and evolution of pathogens [52, 60]. We believe that the per-  
1016 mutree process proposed in this study could be an important elemental technology for such  
1017 phylogenetic tree analysis in the future. In order to focus on permutree methodology in  
1018 machine learning, this paper uses the classical model for the DNA evolution model as is.  
1019 However, it will be necessary to improve the model to a more sophisticated model that  
1020 can represent real-world phenomena more precisely in order to provide some insights for  
1021 real-world applications.

1022 **11. Safeguards**

1023 Question: Does the paper describe safeguards that have been put in place for responsible  
1024 release of data or models that have a high risk for misuse (e.g., pretrained language models,  
1025 image generators, or scraped datasets)?

1026 Answer: [NA]

1027 **12. Licenses for existing assets**

1028 Question: Are the creators or original owners of assets (e.g., code, data, models), used in  
1029 the paper, properly credited and are the license and terms of use explicitly mentioned and  
1030 properly respected?

1031 Answer: [NA]

1032 **13. New Assets**

1033 Question: Are new assets introduced in the paper well documented and is the documentation  
1034 provided alongside the assets?

1035 Answer: [NA]

1036 **14. Crowdsourcing and Research with Human Subjects**

1037 Question: For crowdsourcing experiments and research with human subjects, does the paper  
1038 include the full text of instructions given to participants and screenshots, if applicable, as  
1039 well as details about compensation (if any)?

1040 Answer: [NA]

1041 **15. Institutional Review Board (IRB) Approvals or Equivalent for Research with Human  
1042 Subjects**

1043 Question: Does the paper describe potential risks incurred by study participants, whether  
1044 such risks were disclosed to the subjects, and whether Institutional Review Board (IRB)  
1045 approvals (or an equivalent approval/review based on the requirements of your country or  
1046 institution) were obtained?

1047 Answer: [NA]
